1 **Title:** Systematic analysis of cellular crosstalk reveals a role for SEMA6D-TREM2 regulating  
2 microglial function in Alzheimer's disease

3 **Authors:** Ricardo D'Oliveira Albanus<sup>1,2†</sup>, Gina M Finan<sup>3,4†</sup>, Logan Brase<sup>1,2</sup>, Shuo Chen<sup>5</sup>, Qi  
4 Guo<sup>6</sup>, Abhirami Kannan<sup>1,2</sup>, Mariana Acquarone<sup>1,2</sup>, Shih-Feng You<sup>1,2</sup>, Brenna C  
5 Novotny<sup>1,2</sup>, Patricia M Ribeiro Pereira<sup>7</sup>, John C Morris<sup>2,8,9,10</sup>, David M Holtzman<sup>2,8,9,10</sup>, Eric  
6 McDade<sup>1,10</sup>, Martin Farlow<sup>10,11</sup>, Jasmeer P Chhatwal<sup>10,12</sup>, Dominantly Inherited Alzheimer  
7 Network (DIAN)<sup>10</sup>, Emily E Mace<sup>13</sup>, Bruno A Benitez<sup>14</sup>, Laura Piccio<sup>2,15,16</sup>, Greg T  
8 Sutherland<sup>17</sup>, Qin Ma<sup>6</sup>, Hongjun Fu<sup>5</sup>, Celeste M Karch<sup>1,2,10</sup>, Oscar Harari<sup>1,2\*</sup>, Tae-Wan Kim<sup>3,4\*</sup>

9 **Affiliations:**

10 <sup>1</sup> Department of Psychiatry, Washington University School of Medicine; St. Louis, MO, USA

11 <sup>2</sup> Hope Center for Neurological Disorders, Washington University School of Medicine; St. Louis,  
12 MO, USA

13 <sup>3</sup> Department of Pathology and Cell Biology, Columbia University Irving Medical Center; New  
14 York, NY, USA

15 <sup>4</sup> Taub Institute for Research on Alzheimer's Disease and the Aging Brain, Columbia University  
16 Irving Medical Center; New York, NY, USA

17 <sup>5</sup> Department of Neuroscience, The Ohio State University Wexner Medical Center; Columbus,  
18 OH, USA

19 <sup>6</sup> Department of Biomedical Informatics, Ohio State Comprehensive Cancer Center; Columbus,  
20 OH, USA

21 <sup>7</sup> Department of Radiology, Division of Radiological Sciences, Washington University School of  
22 Medicine; St. Louis, MO, USA

23 <sup>8</sup> Knight Alzheimer Disease Research Center, Washington University School of Medicine; St.  
24 Louis, MO, USA

25 <sup>9</sup> Department of Neurology, Washington University School of Medicine; St. Louis, MO, USA

26 <sup>10</sup> Dominantly Inherited Alzheimer Network (DIAN)

27 <sup>11</sup> Department of Neurology, Indiana University School of Medicine; Indianapolis, IN, USA

28 <sup>12</sup> Department of Neurology, Massachusetts General Hospital, Harvard Medical School; Boston,  
29 MA, USA

30 <sup>13</sup> Department of Pediatrics, Columbia University; New York, NY, USA

31 <sup>14</sup> Department of Neurology, Beth Israel Deaconess, Harvard Medical School; Boston, MA, USA

32 <sup>15</sup> Department of Pathology and Immunology, Washington University School of Medicine; St.  
33 Louis, MO, USA

34 <sup>16</sup> Brain and Mind Centre, School of Medical Sciences, University of Sydney; Camperdown,  
35 NSW, Australia

36 <sup>17</sup> School of Medical Sciences and Charles Perkins Centre, Faculty of Medicine and Health, The  
37 University of Sydney; Sydney, NSW, Australia

38

39 † **Contributed equally**

40 \* **Corresponding authors**

41 **One Sentence Summary:**

42 We investigate cell-to-cell communication in Alzheimer's disease to characterize disease biology  
43 and suggest new avenues for therapeutic intervention.

44 **Abstract:** Cellular crosstalk, mediated by membrane receptors and their ligands, is crucial for  
45 brain homeostasis and can contribute to neurodegenerative diseases such as Alzheimer's disease  
46 (AD). To discover crosstalk dysregulations in AD, we reconstructed crosstalk networks from  
47 single-nucleus transcriptional profiles from 67 clinically and neuropathologically well-  
48 characterized controls and AD brain donors. We predicted a significant role for TREM2 and  
49 additional AD risk genes mediating neuron-microglia crosstalk in AD. The gene sub-network  
50 mediating SEMA6D-TREM2 crosstalk is activated near A $\beta$  plaques and *SEMA6D*-expressing  
51 cells and is disrupted in late AD stages. Using CRISPR-modified human induced pluripotent  
52 stem cell-derived microglia, we demonstrated that SEMA6D induces microglial activation in a  
53 *TREM2*-dependent manner. In summary, we demonstrate that characterizing cellular crosstalk  
54 networks can yield novel insights into AD biology.

55 **Main Text:**

56 **INTRODUCTION**

57 Cross-cellular signaling (cellular crosstalk) is integral to normal brain physiology. By  
58 establishing cellular networks mediated by membrane receptors and their corresponding ligands,  
59 cells can gather information from their immediate environment and respond accordingly. Indeed,  
60 cellular crosstalk is crucial to brain homeostasis and processes of neurodevelopment, such as  
61 synaptic pruning and axon guidance (1, 2). However, increasing experimental and genetic  
62 evidence implicates aberrant cellular crosstalk as a contributing factor to neurodegenerative  
63 diseases, including Alzheimer's disease (AD) (3–6). Furthermore, from a translational  
64 perspective, cellular crosstalk is an attractive molecular target for drug development, as  
65 membrane receptors are relatively amenable to therapeutic targeting (7–9). Therefore, systematic  
66 characterization of brain cellular crosstalk interactions can help identify molecular mechanisms  
67 involved in neurodegeneration and inform novel therapies.

68 Genome-wide association studies (GWAS) have successfully identified genetic risk loci for AD  
69 and nominated genes likely mediating these genetic signals (10–13). Further, by leveraging  
70 human tissue (14–17) and experimental data from human induced pluripotent stem cell (iPSC)-  
71 derived cells (18), functional genomics studies have revealed that many AD risk genes are  
72 expressed by microglial cells. However, how most of these microglial AD risk genes are  
73 regulated in the contexts of normal physiology and AD pathophysiology is still unknown. As the  
74 resident immune cells of the brain, microglia are highly attuned to their surrounding  
75 environment, including signals from neighboring cells (19). While previous studies have shown  
76 causal effects of disrupted crosstalk in neurodegeneration, it remains unclear how cellular  
77 crosstalk between microglia and other cell types is involved in mediating AD genetic risk.

78 Understanding these processes requires techniques that can systematically characterize the  
79 crosstalk networks in the brain, reconstruct the likely signaling pathways downstream of these  
80 interactions, and integrate these data with genetic findings.

81 In this study, we used single-nucleus transcriptomic profiles (snRNA-seq) from clinically,  
82 neuropathologically, and genetically well-characterized human brains to systematically  
83 reconstruct the cellular crosstalk networks across seven major brain cell types: microglia,  
84 astrocytes, oligodendrocytes, oligodendrocyte precursors (OPCs), excitatory and inhibitory  
85 neurons, and endothelial cells. We found that direct involvement of known AD risk genes was  
86 more frequent in neuron-microglia crosstalk interactions than in those between other cell types.  
87 In addition, we identified a sub-network of microglial genes centered around *TREM2* that we  
88 predicted mediates neuron-microglia crosstalk. We predicted that this sub-network is modulated  
89 by the crosstalk interaction between neuronal semaphorin 6D (*SEMA6D*) and microglial  
90 *TREM2*. We found evidence that this sub-network is disrupted in late-stage AD, and, using  
91 spatial transcriptomics, we observed that the *TREM2* sub-network is activated in proximity to A $\beta$   
92 plaques and *SEMA6D*-expressing cells. Finally, we validated our predictions *in vitro* using wild-  
93 type (WT) and *TREM2* knockout (KO) human iPSC-derived microglia (iMGL). We showed that  
94 *SEMA6D* promotes microglia functions, including phagocytosis and cytokine release, in a  
95 *TREM2*-dependent manner. Our findings demonstrate that systematic characterization of cellular  
96 crosstalk networks in human brains is a viable strategy to elucidate aberrant regulatory biology in  
97 AD and other neurodegenerative diseases, which could ultimately inform the development of  
98 novel AD therapies.

## 99 RESULTS

### 100 A complex landscape of crosstalk dysregulation in AD

101 To systematically characterize cellular crosstalk interactions in controls and AD, we analyzed  
102 snRNA-seq profiles of superior parietal cortex tissue samples from brain donors of the Knight  
103 Alzheimer Disease Research Center (Knight ADRC) and the Dominantly Inherited Alzheimer  
104 Network (DIAN), previously published by our group (14). This dataset encompasses different  
105 AD subtypes, including sporadic AD and autosomal dominant AD, with donors distributed in a  
106 broad spectrum of neuropathological states and genetic backgrounds, including carriers of  
107 *TREM2* risk variants (table S1). In total, we analyzed ~300K nuclei representing seven major  
108 brain cell types (microglia, astrocytes, oligodendrocytes, OPCs, excitatory and inhibitory  
109 neurons, and endothelial cells) from 67 donors (Fig. 1A). We identified patterns of ligand-  
110 receptor gene expression across cell type pairs using CellPhoneDB (20), which has been  
111 successfully used to predict patterns of brain cellular crosstalk (5).

112 We predicted crosstalk interactions separately for disease status and genetic group in our  
113 CellPhoneDB analyses. In total, we identified between 961 and 1,600 (median = 1,521)  
114 significant (Bonferroni-corrected  $p < 0.05$ ) crosstalk interactions between cell type pairs across  
115 all donor categories (Fig. 1B; fig. S1A; table S2). We compared the crosstalk patterns across

116 cases and controls to identify global changes associated with disease status. We predicted  
117 significantly more crosstalk interactions involving microglia in AD donors compared to controls  
118 (odds ratio; OR = 1.12,  $p = 0.019$ , Fisher's exact test; **Fig. 1B**; **fig. S2**). Because there is limited  
119 evidence on whether microglia numbers change during AD (21), and we did not observe  
120 significant alterations in the count of microglial nuclei associated with disease state, we speculate  
121 that the increased number of predicted crosstalk interactions involving microglia in AD donors  
122 indicates transcriptional changes consistent with microglial activation. This suggests that  
123 changes in microglial function and state, rather than changes in cell abundance, result in changes  
124 in crosstalk patterns.

125 We next performed a functional enrichment of the genes involved in the predicted crosstalk  
126 interactions specific to each subset of donors to determine which biological pathways are  
127 disrupted in AD. Consistent with widespread perturbations of normal brain physiology in AD,  
128 we observed changes in the cellular crosstalk patterns when comparing AD donors to controls.  
129 The genes involved in crosstalk interactions predicted only in AD donors were significantly  
130 enriched for pathways associated with immune activation and migration (*e.g.*, response to  
131 transforming growth factor  $\beta$ , amoeboid cell/leukocyte migration) and neuronal stress (*e.g.*,  
132 neuron death, ERK1/2 cascade; **fig. S3**). Aiming to understand how each cell type likely  
133 contributes to the dysregulated pathways in AD, we performed a functional enrichment analysis  
134 separately for the crosstalk interactions detected in each cell type in cases versus controls.  
135 Importantly, we observed that crosstalk interactions involving other cell types besides microglia  
136 and neurons were enriched for the very same immune activation and impaired neuronal  
137 homeostasis pathways identified in cases versus controls, further supporting that cellular  
138 crosstalk contributes to these core features of neurodegeneration (**Fig. 1C**). Together, these  
139 results indicate that AD leads to widespread dysregulation of homeostatic cross-cellular  
140 signaling pathways between microglia and neurons with other cells.

#### 141 **Neuron-microglia crosstalk interactions are enriched to involve known AD risk genes as** 142 **ligands or receptors**

143 Our initial analysis yielded a vast array of data, predicting thousands of crosstalk interactions  
144 across all cell types (**Fig. 1B**). The enormity of this data presented a challenge in discerning the  
145 precise role of cellular crosstalk in AD. To render this task more tractable and align it closely  
146 with understanding AD biology, we subsequently concentrated our analysis on interactions  
147 involving genes empirically linked to AD through genetic and functional studies. We identified  
148 90 possible crosstalk interactions directly involving an AD gene as the ligand or receptor (**table**  
149 **S3**). Of these, 34 were significant by CellPhoneDB analyses in at least one cell type pair (**Fig.**  
150 **1D**). We calculated for each cell type the association with crosstalk interactions involving AD  
151 genes using a logistic regression approach (Methods). Microglia had the highest association for  
152 crosstalk interactions involving AD genes across all cell types regardless of which donor subset  
153 we analyzed (association range = 0.25 to 0.68,  $p$  range = 0.015 to 3.53e-3; **fig. S4A**). Notably,  
154 most AD gene interactions (64.9%) were predicted to involve microglia as the receptor cell

155 (table S2). This observation implies that a subset of AD genes in microglia are modulated by  
156 disease-associated alterations in other cells. Therefore, it suggests that the prominent role of  
157 microglia in AD may be the endpoint of a cascade initiated within other cell types. This  
158 highlights the intricate intercellular complexity of disease pathogenesis and underscores the  
159 importance of understanding the role of cellular crosstalk in the development and progression of  
160 AD.

161 To further understand these patterns, we explored the cell types most likely to interact with  
162 microglia through crosstalk interactions involving AD genes. We calculated the association of  
163 crosstalk interactions involving AD genes for microglia interactions with each cell type. We  
164 found that excitatory neurons displayed the highest association with microglia for these  
165 interactions (association range = 0.60 to 1.12,  $p$  range = 0.042 to  $1.11e-3$ ; **fig. S4B**). To further  
166 validate our findings, we leveraged data from three additional case-control snRNA-seq studies to  
167 perform a joint analysis (mega-analysis). These datasets were drawn from the prefrontal cortex  
168 region and sourced from the South West Dementia Brain Bank (SWDBB), the Rush ADRC, and  
169 the University of California Irvine Institute for Memory Impairments and Neurological Disorders  
170 (UCI MIND) ADRC (**table S4**) (16, 22, 17). We observed the same consistent, strong  
171 association of microglia with AD-related crosstalk interactions in each study individually or in  
172 combination (association range: 0.24 to 0.68, median = 0.53,  $p$  range: 0.022 to  $3.49e-04$ , median  
173 =  $6.17e-03$ ; **Fig. 1F, fig. S4A**). We also observed the strongest association of crosstalk  
174 interactions involving AD genes for microglia with excitatory neurons (association range = 0.34  
175 to 0.44,  $p$  range =  $4.07e-04$  to  $3.38e-03$ ; **Fig. 1G**), as well as weaker but significant associations  
176 with inhibitory neurons, oligodendrocytes, and endothelial cells. Among the individual studies,  
177 we observed some variability concerning which type of broad neuronal cell (excitatory or  
178 inhibitory) had the highest association for interactions with microglia involving AD genes (**fig.**  
179 **S4B**). Together, our findings highlight similar overarching patterns across cohorts and brain  
180 regions. This convergence of results suggests that a subset of genes previously linked with AD  
181 may facilitate cell signaling pathways between neurons and microglia.

## 182 **Cellular crosstalk pattern predictions are robust to cell representation and other potential** 183 **confounding factors**

184 To determine that our previous results were not driven by the cell type composition of the  
185 datasets, the higher representation of AD genes in microglia compared to other cell types, or  
186 other possible confounding factors, we statistically controlled for different potential sources of  
187 bias in our analyses. First, we observed that the global crosstalk patterns remained similar with  
188 dataset downsampling, including removing a subset of donors, using a single donor, and using at  
189 most 100 barcodes per snRNA-seq cluster (fraction of replication 0.81 to 0.86, median = 0.84;  
190 **fig. S1B-E**). These results indicate that the crosstalk interaction patterns identified using  
191 CellPhoneDB are highly robust to the number of donors, skews in donor representation, cell type  
192 representation, number of nuclei, and sequencing depth.

193 Next, we tested whether microglia expressed more genes present in the CPDB database and if  
194 this could confound our findings. We observed that microglia and endothelial cells indeed  
195 expressed more genes listed as putative ligands or receptors in CellPhoneDB (**fig. S5A**).  
196 However, despite more genes associated with crosstalk interactions being expressed in microglia,  
197 we did not observe an overrepresentation of AD genes participating in microglia crosstalk  
198 interactions compared to other cell types (**fig. S5B**). To address this potential confounding factor  
199 further, we calculated the enrichment of crosstalk interactions in genes nominated by GWAS for  
200 other neurological or neuropsychiatric traits (**table S5**). We only used crosstalk interactions  
201 predicted from the control donors from this study to make results comparable across traits. This  
202 approach is an orthogonal strategy to determine if the abundance of microglia genes in the  
203 CellPhoneDB database skewed our previous enrichment results. Our reasoning was that if the  
204 crosstalk interactions observed in this study were biased towards microglia or other cell types  
205 due to database overrepresentation, we would expect to observe skewed enrichment patterns  
206 across traits. On the contrary, we observed distinct crosstalk enrichment patterns across  
207 neuropsychiatric traits (**Fig. 1G**). For example, crosstalk interactions involving OPCs were  
208 significantly associated with genes from one schizophrenia GWAS (association = 1.00, adj.  $p =$   
209 0.007). We also observed a nominally significant association for inhibitory neurons in genes  
210 identified in one major depressive disorder (MDD) GWAS (association = 0.57,  $p = 0.02$ ).  
211 Importantly, we replicated the enrichment for microglia crosstalk interactions in genes from two  
212 AD GWAS (Jansen *et al.* and Marioni *et al.* Association = 1.16 and 1.05, adj.  $p = 0.016$  and  
213 0.006, respectively) (23, 24). These results confirm that the crosstalk enrichment patterns across  
214 cell types are specific to each trait, and we did not observe a skew towards microglia or  
215 endothelial cells in any of the other traits despite these two cell types expressing more genes  
216 participating in CellPhoneDB interactions. This approach also independently highlights the  
217 crucial role of microglia mediating AD genetic risk.

218 Finally, we addressed the potential for bias resulting from the selection of candidate AD genes  
219 for our crosstalk analyses. The complex task of identifying causal genes in AD GWAS can  
220 hinder the accurate determination of cell types mediating AD genetic risk at individual loci. In  
221 addition, the possibility of nominating multiple genes within the same locus, likely participating  
222 in similar pathways (*e.g.*, the MS4A locus (25)), could lead to over-representation (“double-  
223 counting”) of the same GWAS signal. To mitigate these biases, we adopted a data-driven  
224 approach for nominating AD genes, relying strictly on cell type-specific chromatin co-  
225 accessibility between gene promoter regions and a fine-mapped AD GWAS variant (12) or the  
226 direct overlap of fine-mapped variants at the gene promoter region (Methods). This stringent  
227 approach nominates candidate AD genes and their corresponding cell types solely based on  
228 direct evidence from a public brain snATAC-seq dataset (17). Despite microglia being among  
229 the least abundant cell types in the snATAC-seq dataset analyzed, we observed a two-fold higher  
230 enrichment for microglia crosstalk interactions in AD compared to using our original AD genes  
231 list (association = 1.51,  $p = 1.89\text{e-}4$ ; **Fig. 1H**). This result shows that the enrichment of AD-  
232 related crosstalk interactions is robust to varying degrees of stringency in the strategy for

233 selecting candidate AD genes and independently recapitulates the well-established role of  
234 microglia in mediating AD genetic risk.

235 Combined, these results indicate that the observed crosstalk enrichment patterns were highly  
236 robust to potential technical confounding factors. Furthermore, these analyses highlight that our  
237 crosstalk framework is highly flexible and can be extended to understand biological processes  
238 associated with other neurological and neuropsychiatric diseases.

### 239 **Microglia and neurons crosstalk interactions regulate additional known AD genes in** 240 **microglia**

241 Given our previous results prioritizing neuron-microglia crosstalk interactions in AD, we sought  
242 to investigate how the crosstalk signals between neurons and microglia could regulate gene  
243 regulatory networks downstream in microglia. Using a systems biology approach based on  
244 extending the functionality of the CytoTalk software (26) (Methods), we reconstructed the gene  
245 co-expression networks upstream of the crosstalk ligands and downstream of the receptors.  
246 CytoTalk is complementary to CellPhoneDB, as the latter does not inform the biological  
247 processes likely downstream of crosstalk interactions. In addition, the crosstalk interactions  
248 prioritized by Cytotalk reflect their predicted regulatory impact based on the co-expression  
249 network topology. Importantly, we did not restrict the crosstalk interactions in CytoTalk to those  
250 involving AD genes to allow an unbiased crosstalk prioritization. This way, any AD-related  
251 crosstalk interactions prioritized by Cytotalk reflect their predicted importance in modulating  
252 central genes in their respective co-expression networks.

253 Using CytoTalk, we reconstructed the gene regulatory network associated with crosstalk  
254 interactions between excitatory neurons and microglia for each donor category, which was then  
255 combined into a single network to help understand the broader biological processes likely  
256 regulated by neuron-microglia crosstalk (**Fig. 2A-B**). We focused on excitatory neurons because  
257 they had the highest association of AD-related crosstalk interactions with microglia and were the  
258 most represented broad neuronal subtype in our data (**Fig. 1A and 1F**). The microglia crosstalk  
259 network identified by CytoTalk was enriched for immune processes, including phagocytosis and  
260 cytokine production (**Fig. 2C**, consistent with neuron-microglia crosstalk interactions modulating  
261 microglia activation states (27). Strikingly, the microglia co-expression network downstream of  
262 the prioritized neuron-microglia crosstalk interactions was enriched for genes previously  
263 associated with AD, even after statistically accounting for the overrepresentation of AD-related  
264 genes expressed in microglia (Methods; cases OR = 3.50, adj.  $p = 3.92e-5$ ; **Fig. 2D**). These  
265 results suggest that neuron-microglia crosstalk interactions propagate signals that modulate genes  
266 previously implicated in AD and involved in regulating microglial activation.

267 Among the seven crosstalk interactions prioritized by CytoTalk based on the co-expression  
268 network topology, we identified the interaction between the neuronal ligand semaphorin 6D  
269 (SEMA6D) and TREM2/TYROBP (DAP12) (**Fig. 2B**). This crosstalk interaction was initially  
270 described in the context of peripheral myeloid cells activation (28), but its role in microglia and



271 AD remains unknown. Given the central role of TREM2 in AD genetic risk, this notable  
272 knowledge gap motivated us to pursue this interaction further.

273 The TREM2-SEMA6D crosstalk is mediated by PLXNA1 (28). Because of the low detection  
274 rate and limited dynamic range of *PLXNA1* in our snRNA-seq data (only ~10% of microglia had  
275 detectable *PLXNA1* levels; max. *PLXNA1* expression = 3 reads; **fig. S6**), *PLXNA1* was not  
276 included in the CytoTalk reconstructed network. This is a reported limitation of snRNA-seq for  
277 lowly expressed genes (29, 30) and precluded the reconstruction of the *PLXNA1* co-expression  
278 network by CytoTalk, resulting in a direct link between *SEMA6D* and *TREM2/TYROBP* in the  
279 excitatory neuron-microglia network. Nonetheless, microglial *PLXNA1* and neuronal *SEMA6D*  
280 expression patterns were sufficiently specific for both CellPhoneDB and CytoTalk independently  
281 detect and prioritize the SEMA6D-PLXNA1/TREM2 crosstalk interaction between microglia  
282 and neurons in our analyses.

### 283 **The SEMA6D-TREM2 crosstalk axis is predicted to modulate microglia activation**

284 We next sought to understand how the TREM2-SEMA6D crosstalk interaction could regulate  
285 microglia biology. We identified a sub-network comprised of genes highly connected to *TREM2*  
286 and *TYROBP* by partitioning the microglia crosstalk network into sub-networks (Methods). Our  
287 crosstalk network reconstruction analysis predicted that this *TREM2* sub-network is the target of  
288 neuronal SEMA6D (**Fig. 2E**). Furthermore, the *TREM2* sub-network was enriched for microglia  
289 activation pathways, indicating that we recapitulated the well-established link between TREM2  
290 and microglia activation (31) through this unsupervised approach (**Fig. 2D**). Interestingly, in  
291 addition to genes linked to microglia activation, the TREM2 crosstalk sub-network included  
292 *APOE* and *HLA* genes, previously reported as AD risk genes. The co-expression of *TREM2* and  
293 *APOE* is consistent with studies showing that APOE is a TREM2 ligand (32, 33). We identified a  
294 similar sub-network at the interface of the reconstructed inhibitory neurons and microglia  
295 crosstalk network, indicating that this is a general feature of neuron-microglia communication  
296 (**fig. S7A**). These results suggest that the TREM2-SEMA6D crosstalk interaction modulates AD  
297 risk genes in microglia and is a core feature of neuron-microglia communication.

298 To validate these results, we repeated the CytoTalk analyses in the snRNA-seq studies from the  
299 SWDBB, Rush ADRC, and UCI MIND ADRC cohorts (16, 17, 22). Consistent with our results,  
300 CytoTalk prioritized the SEMA6D-TREM2 signaling axis mediating the crosstalk interactions  
301 between excitatory neurons and microglia in all three cohorts, as well as identifying a similar  
302 *TREM2* subnetwork in all but one of the datasets (**fig. S7B**). Finally, we determined that the  
303 *TREM2* sub-network and its predicted modulation by SEMA6D were robust to the choice of  
304 donors and the number of nuclei used to reconstruct the crosstalk network (**fig. S7C**). Together,  
305 these results reinforce that the unsupervised methodological approach in this study identified  
306 core elements of microglia gene regulation, which are predicted to be modulated by neuron-  
307 microglia cellular crosstalk interactions.

### 308 **The microglia *TREM2* sub-network expression is negatively associated with late AD stages**

309 We next sought to understand how the *TREM2* sub-network related to AD progression. We  
310 leveraged the wide range of neuropathological states in our dataset to develop a statistical  
311 framework to test the association of this sub-network gene expression level with disease severity  
312 while controlling for genetic and other confounding factors (Methods). By analyzing gene  
313 expression at the level of gene sub-networks, this approach also helped mitigate data sparsity in  
314 snRNA-seq differential expression analysis. Given the comprehensiveness of Braak staging  
315 among the neuropathological annotations within our cohort, we used high Braak stage (Braak  $\geq$   
316 IV) as a surrogate of AD severity. Using this approach, we determined that the expression of the  
317 *TREM2* sub-network was negatively associated with high Braak stage (beta = -0.31, adj.  $p$  =  
318 4.32e-57), indicating that this sub-network is downregulated in later AD stages. To understand  
319 this result within the broader context of all neuron-microglia crosstalk interactions, we calculated  
320 the association of all neuron-microglia crosstalk sub-networks with high Braak stage.  
321 Remarkably, the majority (11 of 14) of the microglia crosstalk sub-networks were negatively  
322 associated with high Braak stage, and the *TREM2* sub-network was among the most negatively  
323 associated with high Braak stage (**Fig. 2F**). These results suggest that neuron-microglia crosstalk  
324 interactions and their downstream targets in microglia are impaired in the later stages of AD.

325 Next, we sought to determine if *SEMA6D* is a potential modulator of the *TREM2* microglia  
326 crosstalk sub-network. We reasoned that if this were the case, the neuronal *SEMA6D* crosstalk  
327 sub-network association with Braak stage would agree in direction with the *TREM2* sub-  
328 network. Indeed, the neuronal *SEMA6D* sub-network was also negatively associated with high  
329 Braak stage (beta = -0.09, adj.  $p$  = 1.63e-04; **Fig. 2G**). Therefore, our findings indicate that the  
330 biological processes associated with the *SEMA6D*-*TREM2* neuron-microglia crosstalk  
331 interactions are disrupted in AD and likely play a protective role by regulating *TREM2*-  
332 dependent microglia activation.

### 333 **Multiple microglia co-expression sub-networks are disrupted during AD progression**

334 To gain further insights into the role of microglia in AD, we next adapted the network analysis  
335 framework of CytoTalk to analyze the transcriptome-wide microglia co-expression network (*i.e.*,  
336 using all expressed genes in microglia instead of the subset prioritized by CytoTalk; Methods).  
337 This approach allowed us to test the association of all microglia sub-networks with high Braak  
338 stage, regardless of the presence of reported ligands/receptors in the sub-networks. We  
339 partitioned this broader reconstructed microglia co-expression network in 360 sub-networks and  
340 independently recapitulated several sub-networks from the previous crosstalk-prioritized network  
341 reconstruction, including the *TREM2* sub-network (**fig. S8**). These microglia sub-networks were  
342 divided between positive and negative associations with high Braak stage (**Fig. 2H; table S6**).  
343 Consistent with the well-established roles of *PSEN1* and *APP* in AD onset (34), the *PSEN1* and  
344 *APP* co-expression sub-networks were among the most positively correlated with high Braak  
345 stage (betas = 0.32 and 0.16, adj.  $p$  = 8.25e-57 and 2.17e-13, respectively). In contrast, the sub-  
346 network of *SORL1*, a gene associated with protective roles in AD (35, 36), was negatively  
347 associated with Braak stage (beta = -0.15, adj.  $p$  = 3.52e-11). Interestingly, our unsupervised

348 approach identified two separate sub-networks with opposing directions of effect for the genes in  
349 the *MS4A* locus, which genetically controls soluble *TREM2* levels (25) (*MS4A4A* and *MS4A6A*  
350 betas = -0.11 and 0.19, adj.  $p = 2.87e-06$  and  $2.93e-20$ , respectively). This result suggests that the  
351 *MS4A* genetic signal regulates at least two independent biological processes, consistent with  
352 what we reported in a previous study (25). Notably, within the context of all microglia genes, the  
353 *TREM2* sub-network was among the most negatively associated with Braak stage (**Fig. 2H**),  
354 consistent with our analysis of the crosstalk-prioritized network. These results indicate that  
355 multiple biological pathways downstream of microglia-neuronal crosstalk are disrupted in AD.  
356 Furthermore, our unsupervised computational framework identified impaired *TREM2*-dependent  
357 microglia activation associated with AD progression.

### 358 **The *TREM2* sub-network expression correlates with proximity to A $\beta$ plaques and is up-** 359 **regulated in the presence of *SEMA6D***

360 Our previous findings that the *TREM2* sub-network was among the most negatively associated  
361 with advanced AD stages motivated us to better understand how its expression changed as a  
362 function of neuropathological burden. To do so, we reanalyzed spatial transcriptomics profiles  
363 (10X Genomics Visium) from three control and three AD (Braak III and IV) human brains (37)  
364 and quantified the effects of local neuropathology, in particular proximity to A $\beta$  plaques, in  
365 relation to gene expression patterns (**Fig. 2I**).

366 We first analyzed the global changes in gene expression between AD cases and controls and  
367 identified only 7 of 31 genes in the *TREM2* sub-network with nominal significant association  
368 (median  $\log_2$  fold-change = 0.67; **Fig. 2J-K**). However, when we compared A $\beta$  plaque-proximal  
369 to A $\beta$  plaque-distal regions, we observed significant up-regulation of most genes in the *TREM2*  
370 sub-network (17 of 31 genes at least nominally significant, median  $\log_2$  fold-change = 0.18). The  
371 spatially resolved data also showed a progressive overexpression of genes in the *TREM2* sub-  
372 network as a function of A $\beta$  plaque proximity (**fig. S9A-B**), indicating that this pathway is likely  
373 involved in the immune response to amyloid pathology. Supporting this hypothesis, we observed  
374 that other gene signatures linked to plaque-associated microglia in single-cell transcriptomics  
375 studies of AD mouse models (15, 38) were also overexpressed with A $\beta$  proximity (**fig. S9C**).

376 Lastly, we leveraged the resolved spatial relationship of this dataset to test whether the *TREM2*  
377 sub-network expression levels changed in proximity to *SEMA6D*-expressing cells. In line with  
378 our single-cell analyses, we observed a significant up-regulation of the *TREM2* sub-network  
379 when comparing *SEMA6D*-positive versus *SEMA6D*-negative Visium spots (19 of 31 genes at  
380 least nominally significant; median  $\log_2$  fold-change = 0.081; **Fig. 2J-K**). The level of *TREM2*  
381 sub-network activation in proximity to *SEMA6D* was comparable between cases and controls  
382 (**fig. S9D**). These results, combined with the lower expression of the *TREM2* subnetwork in the  
383 high Braak stages donors from the snRNA-seq data (**Fig. 2H**), suggest that the *TREM2* crosstalk  
384 sub-network is active during earlier Braak stages, responds to local neuropathology (A $\beta$  plaques)  
385 and *SEMA6D* signaling, but loses function as the disease progresses. Our findings suggest that  
386 the *TREM2* sub-network is involved in the response to A $\beta$  plaques and is activated by *SEMA6D*.

387 **SEMA6D induces immune activation in iPSC-derived microglia in a TREM2-dependent**  
388 **manner**

389 To elucidate the role of SEMA6D-TREM2 crosstalk in microglia function, we used a human  
390 iPSC-derived microglia model (39) (iMGL; **fig. S10A**; Methods) that expresses established  
391 microglia markers, including TREM2, IBA1, and TMEM119 (**fig. S10B**). In addition, we  
392 generated *TREM2* KO human iPSCs using CRISPR/Cas9 to examine the role of the SEMA6D-  
393 TREM2 signaling axis on microglia function (**fig. S10C**). We verified the loss of TREM2  
394 expression at the protein level in the KO cell line by western blot analysis (**fig. S10D**).

395 Because microglia regulate brain homeostasis through phagocytic activity and modulate  
396 neuroinflammation by releasing immune cytokines (40–42), we performed phagocytosis and  
397 cytokine assays (**fig. S11**). To determine if SEMA6D can regulate iMGL phagocytic activity and  
398 whether this process is TREM2 dependent, we treated WT and *TREM2* KO iMGL with  
399 recombinant SEMA6D protein. We measured the degree of phagocytic activity using pHrodo-  
400 labeled human synaptosomes as the phagocytic cargo. We observed increased phagocytosis in  
401 WT iMGL treated with SEMA6D starting at 6 hours of treatment with SEMA6D (1.3-fold  
402 change increase at 24 hours,  $p = 1.50e-8$ ). In contrast, *TREM2* KO iMGL treated with SEMA6D  
403 had a less pronounced increase in phagocytosis compared to untreated *TREM2* KO cells (1.1-fold  
404 change increase at 24 hours,  $p = 0.001$ ; **Fig. 3A-B**; **fig. S12A**). In parallel, we analyzed  
405 conditioned media of WT and *TREM2* KO iMGL using a multiplex immunoassay to determine if  
406 SEMA6D can regulate iMGL cytokine release. We found that SEMA6D increased the secretion  
407 of TNF- $\alpha$  by and IL-6 in WT but not *TREM2* KO iMGL (WT TNF- $\alpha$  and IL-6 fold-changes =  
408 1.37 and 3.59,  $p = 4.58e-5$  and  $3.11e-5$ , respectively; **Fig. 3C**). We replicated the effects of  
409 SEMA6D treatment in iMGL generated from an independent WT isogenic iPSC line, indicating  
410 that the observed effects of SEMA6D treatment in iMGL activation were not due to cell line-  
411 specific effects (**fig. S12B-C**). Together, these results indicate that SEMA6D increases iMGL  
412 phagocytosis and secretion of TNF- $\alpha$  and IL-6 cytokines in a primarily TREM2-dependent  
413 manner.

414 TREM2 mediates signaling through the adaptor protein TYROBP (DAP12), and the activation of  
415 TREM2 results in tyrosine phosphorylation within the ITAM motif and subsequent SYK  
416 phosphorylation (43). To determine if SEMA6D activates TREM2 downstream signaling, we  
417 analyzed WT and *TREM2* KO iMGL protein lysates for phosphorylated SYK expression (p-  
418 SYK) normalized to total SYK expression (SYK). Treatment of WT iMGL with SEMA6D  
419 induced a 1.84-fold increase in SYK phosphorylation ( $p = 0.0023$ ), but these effects were not  
420 significant in *TREM2* KO iMGL ( $p = 0.13$ ; **Fig. 3D-E**; **fig. S13**). These results demonstrate that  
421 SEMA6D can directly activate TREM2 signaling and suggests that SEMA6D signals through the  
422 TREM2/TYROBP (DAP12) complex in microglia (**Fig. 3F**), although we cannot exclude that  
423 SEMA6D simultaneously activates other signaling pathways.

424 To systematically characterize the transcriptional changes induced by SEMA6D treatment in  
425 iMGL, we generated bulk RNA-seq data for the SEMA6D-treated WT and *TREM2* KO iMGL

426 and the corresponding untreated controls (**fig. S13**). We observed significant transcriptional  
427 changes associated with *TREM2* KO (n = 1,408 differentially expressed genes at 5% FDR; **fig.**  
428 **S13A-B**). As expected, *TREM2* was among the most downregulated genes in the *TREM2* KO  
429 iMGL (adj.  $p = 4.30e-22$ , rank = 26; **fig. S13A**). Strikingly, we observed robust transcriptional  
430 changes in SEMA6D-treated WT iMGL but not in SEMA6D-treated *TREM2* KO iMGL (n =  
431 2,960 and 153 differentially expressed genes at 5% FDR, respectively; **Fig. 3G**; **fig. S13A-B**),  
432 consistent with a pivotal role for TREM2 in mediating SEMA6D signaling in microglia. To  
433 further understand how TREM2 mediates this signaling pathway, we focused on the *TREM2* co-  
434 expression crosstalk sub-network predicted from the snRNA-seq data (**Fig. 2E**). The *TREM2*  
435 sub-network had significantly lower expression in the untreated *TREM2* KO iMGL than WT  
436 (median  $\log_2$  fold-change = -0.22, adj.  $p = 4.76e-04$ ), consistent with TREM2 being a key  
437 regulator of this sub-network. In line with this interpretation, the *TREM2* sub-network was  
438 activated by SEMA6D treatment in the WT iMGL (median  $\log_2$  fold-change = 0.40, adj.  $p =$   
439  $7.50e-3$ ) but significantly less so in the *TREM2* KO iMGL (median  $\log_2$  fold-change = 0.06, adj.  
440  $p = 0.040$ ; **Fig. 3H-I**). These results are consistent with the TREM2 signaling pathway being the  
441 primary mediator of SEMA6D in microglia but also suggest that SEMA6D can activate other  
442 pathways in microglia to a lesser extent.

443 We next analyzed biologically relevant transcriptional signatures previously described in  
444 microglia to gain further insights into how SEMA6D treatment regulates microglial  
445 transcriptional programs. These included genes up-regulated in phagocytosing microglia (41)  
446 and those up-regulated in response to LPS treatment (18). As control signatures, we included  
447 genes down-regulated in another *TREM2* KO iMGL dataset (44) and a set of randomly selected  
448 genes for which we would not expect any concerted transcriptional changes. We observed the  
449 strongest effects of SEMA6D treatment in the phagocytosing microglia gene signature (median  
450  $\log_2$  fold-change = 0.47; **Fig. 3I**), indicating that SEMA6D activates genes involved in  
451 phagocytosis in the WT but not *TREM2* KO iMGL. Notably, *TREM2*, *APOE*, and *RPS19* are  
452 among the most up-regulated genes by SEMA6D treatment in WT iMGL. These genes are either  
453 present in the phagocytosing microglia gene signature or correspond to genes previously linked  
454 to microglia activation (38, 15) (**Fig. 3J**). Our results indicate that SEMA6D-TREM2 crosstalk  
455 signaling induces a TREM2-mediated cascade of transcriptional events resulting in microglia  
456 activation.

## 457 **DISCUSSION**

458 In this study, we leveraged single-nucleus gene expression profiles from a diverse cohort of brain  
459 donors to systematically dissect the contribution of cross-cellular signaling (cellular crosstalk)  
460 networks to AD. Our data-driven approach to identifying active crosstalk interactions and  
461 reconstructing their corresponding downstream pathways provides additional evidence that  
462 disrupted cellular crosstalk networks contribute to neurodegeneration. One remarkable finding  
463 from our study is that a significant portion of AD risk genes is either directly involved in  
464 crosstalk interactions or immediately downstream of crosstalk interactions involving microglia.

465 These results highlight the difficulty of characterizing the prominent role of microglia in AD, as  
466 the integration of complex signals originating in other brain cell types is core to their function.  
467 Specifically, our results support that dysregulation of the intricate signaling between neurons and  
468 microglia is linked to AD progression. Therefore, focusing on cellular crosstalk networks can  
469 provide further functional context to understand the biology of genes associated with AD risk in  
470 a cell-autonomous and non-autonomous manner.

471 Among the interactions we detected between neurons and microglia, we identified a functional  
472 link between neuronal SEMA6D and microglial TREM2. Semaphorins and their receptors  
473 regulate immune cell function and are genetically and functionally implicated in AD (6, 45–47).  
474 In the brain, semaphorin signaling was initially described as a mediator of axon guidance via the  
475 plexin family of receptors (48). However, a growing body of evidence indicates these molecules  
476 are involved in immune responses (5, 28, 45, 49–51). The role of SEMA6D in immune  
477 activation was described in a study showing that SEMA6D induces activation of bone marrow-  
478 derived macrophages in a TREM2- and PLXNA1-dependent manner via the activation of  
479 DAP12, consistent with the formation of a complex (28, 52, 53). Additional studies also linked  
480 semaphorin signaling to immune activation and neurodegeneration (5, 51, 54–56). However,  
481 despite the role of SEMA6D in TREM2-dependent immune activation of peripheral myeloid  
482 cells being described over a decade ago (which allowed us to computationally test this  
483 interaction in the first place) and the well-established role of TREM2 in AD genetic risk, there is  
484 a notable gap of understanding regarding this signaling pathway in the context of microglia and  
485 AD. By leveraging iMGL, we demonstrated that SEMA6D signaling induces a TREM2-  
486 dependent microglia activation phenotype marked by phagocytosis and inflammatory cytokine  
487 release and transcriptionally similar to phagocytosing microglia (41). Nevertheless, it remains to  
488 be determined if SEMA6D induces a state of microglia that might be beneficial in clearing  
489 neuropathological changes associated with AD. Our observation that the *TREM2* co-expression  
490 sub-network is activated in the proximity of A $\beta$  plaques and *SEMA6D*-expressing cells,  
491 combined with our observation that the transcriptional networks upstream and downstream of the  
492 SEMA6D-TREM2 interaction are downregulated in late AD stages, suggest that loss of this  
493 interaction exacerbates the deleterious processes occurring in the later stages of this disease.

494 Our single-cell transcriptomics analyses implicated excitatory neurons as the primary partners  
495 for microglia regarding the SEMA6D-TREM2 crosstalk interaction. However, we also observed  
496 *SEMA6D* expression in other neuronal subtypes and, to a lesser extent, in other cell types.  
497 Therefore, further experimental studies, such as cell co-cultures, are necessary to precisely  
498 determine the primary cell types contributing to SEMA6D-TREM2 signaling in microglia.

499 A previous study showed that SEMA6D promotes peripheral dendritic cell activation and  
500 osteoclast differentiation via the receptor complex harboring PLXNA1 and TREM2 (28). Thus, it  
501 is conceivable that SEMA6D functions as a natural ligand for the PLXNA1/TREM2 co-receptor  
502 and enhances TREM2 signaling in human microglia. Therefore, neuronal SEMA6D could  
503 influence functional properties and fate via the stimulation of TREM2-dependent intracellular

504 signaling and induction of the *TREM2* gene expression network. However, other studies  
505 described how SEMA6D also regulates lipid metabolism and polarization of macrophages via  
506 the interaction with another class A plexin family member, Plexin A4 (49, 57). Plexin A4 coding  
507 variants have been linked to AD risk (49, 58) and found to modulate amyloid and tau pathology  
508 (54). Thus, semaphorin-plexin signaling may play a fundamental role in regulating the functional  
509 interactions with microglia and other cell types and may be perturbed in AD. Given that we  
510 observed weak transcriptional effects in iMGL associated with SEMA6D treatment in the  
511 absence of *TREM2*, it is possible that other proteins, such as Plexin A4, act as secondary  
512 SEMA6D receptors in microglia. Therefore, future studies are necessary to determine the  
513 complete network of proteins mediating SEMA6D crosstalk in microglia.

514 While this study focused on a restricted subset of crosstalk interactions involving microglia and  
515 neurons, our systematic characterization of cross-cellular signaling patterns identified thousands  
516 of candidate interactions involving all brain cell types represented in our snRNA-seq data.  
517 Several of these interactions warrant further investigation. For example, the interleukin receptor  
518 IL1RAP has been previously implicated in genetic studies of AD endophenotypes (3, 59–61),  
519 and the contribution of IL-1 signaling to neurodegenerative diseases is well-established (62–64).  
520 In line with these studies, we identified the *IL1RAP* sub-network in microglia as the most  
521 negatively associated with Braak stage (**table S6**). These results suggest that the IL-1 signaling  
522 pathway disruption is likely involved in AD progression. More broadly, the IL1RAP case  
523 highlights that the continued exploration of brain crosstalk networks identified in this study will  
524 yield valuable biological insights into AD biology.

525 A limitation of our study is its reliance on existing databases of curated crosstalk interactions,  
526 which exclude interactions not yet reported in the literature. Moreover, our transcriptomics-based  
527 approach may overlook cellular communication mediated by molecules synthesized through  
528 complex biochemical pathways lacking canonical ligand genes (*e.g.*, lipids and some  
529 neurotransmitters) or not relying on a specific receptor in the conventional sense (*e.g.*, nitric  
530 oxide signaling). Finally, our understanding of the genetic risk of AD and other neuropsychiatric  
531 traits is incomplete. This knowledge gap hinders not only the discovery of yet-unknown risk  
532 genes but also their corresponding crosstalk networks, thus precluding a complete  
533 characterization of the role of cellular crosstalk in neurodegeneration. Despite these constraints,  
534 our results indicate that a systematic characterization of cellular crosstalk networks can provide  
535 valuable insights into the biology of neurodegenerative diseases, potentially aiding in identifying  
536 novel therapeutic targets. Given our findings, we advocate for developing new high-throughput  
537 assays to systematically identify cell-to-cell communication pathways.

538 Finally, we identified unique crosstalk enrichment patterns for genes found in genetic studies of  
539 other neurological or neuropsychiatric traits. This underscores the integral role of cellular  
540 crosstalk in normal brain physiology and suggests that acknowledging this regulatory layer could  
541 aid in understanding how candidate disease risk genes fit into biological pathways. Together, our  
542 findings strongly support that the systematic characterization of cellular crosstalk networks is a

543 viable strategy for gaining insight into the biology of neurodegenerative diseases and nominating  
544 targets for novel therapies.

545

## 546 **MATERIALS AND METHODS**

### 547 **Study design**

548 Samples were previously obtained with informed consent for research use and were approved by  
549 the review board of Washington University in St. Louis. AD neuropathological changes were  
550 assessed according to the National Institute on Aging-Alzheimer's Association (NIA-AA)  
551 criteria. Demographic, clinical severity and neuropathological information are available in our  
552 original study (14).

### 553 **iMGL experiments**

554 All experimental procedures are described in the Supplementary Materials of this manuscript.

### 555 **Statistical analyses**

556 Detailed computational and statistical methods are described in the Supplementary Materials of  
557 this manuscript.



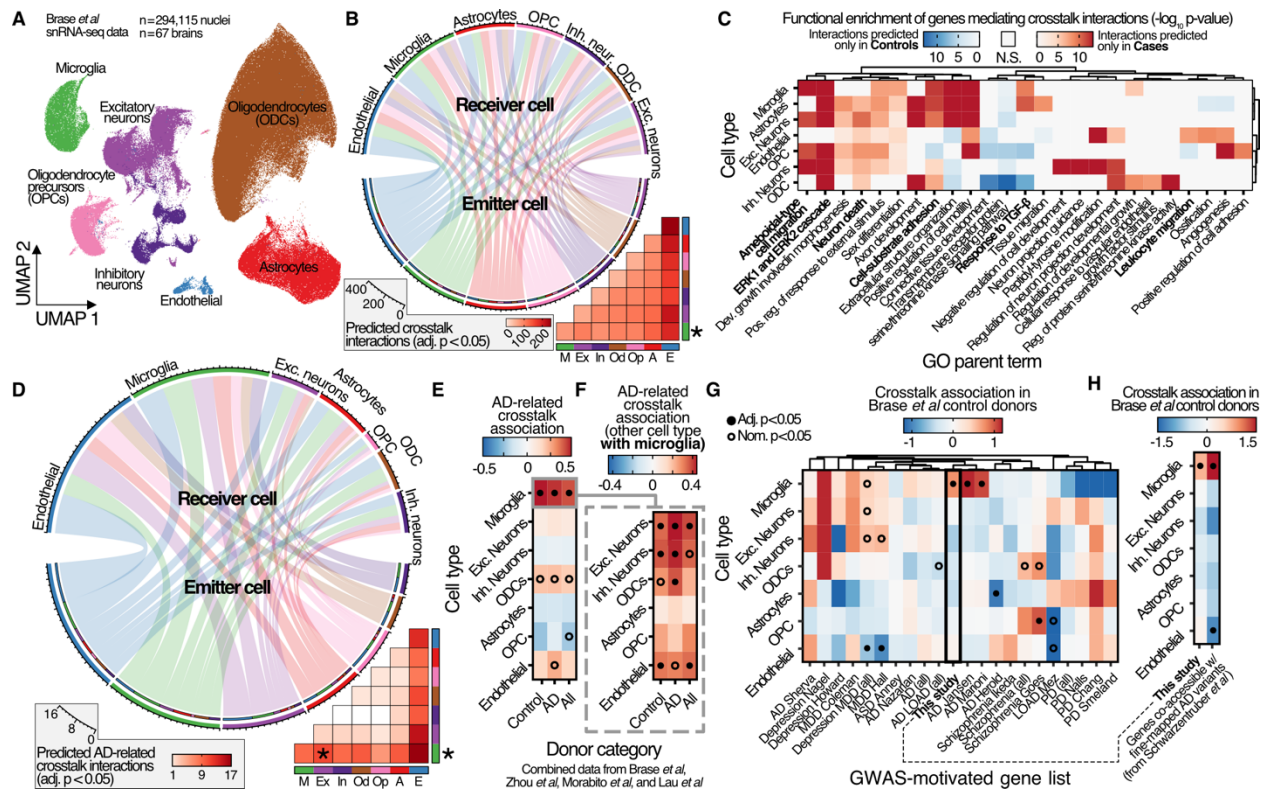

558

559 **Fig. 1: Overview of predicted cellular crosstalk interactions in human brains.** A) Uniform  
 560 Manifold Approximation and Projection (UMAP) representation of the snRNA-seq dataset  
 561 identifying the seven major brain cell types investigated in this study. B) Number of unique  
 562 significant CellPhoneDB interactions detected involving each cell type as either the ligand or  
 563 receptor across donor categories. Asterisks indicate cell types with significantly different number  
 564 of predicted crosstalk interactions between cases and controls (from fig. S2). C) Gene ontology  
 565 enrichments of genes mediating crosstalk interactions only detected in cases (red colors) and  
 566 controls (blue colors). D) Cellular crosstalk interactions involving one AD gene as either ligand  
 567 or receptor across all cellular state pairs. Asterisks indicate cell types (outermost asterisk) and  
 568 cell type pairs (heatmap asterisk) significantly enriched for AD-related interactions. E)  
 569 Association of AD crosstalk interactions for each cell type using combined data from multiple  
 570 snRNA-seq datasets. F) Association of AD crosstalk interactions between microglia and other  
 571 cell types. G) Crosstalk associations for each cell type (control donors from this study) in genes  
 572 nominated by GWAS from multiple neuropsychiatric traits. H) Similar to (G) but using only AD  
 573 genes supported by snATAC-seq co-accessibility (Methods).

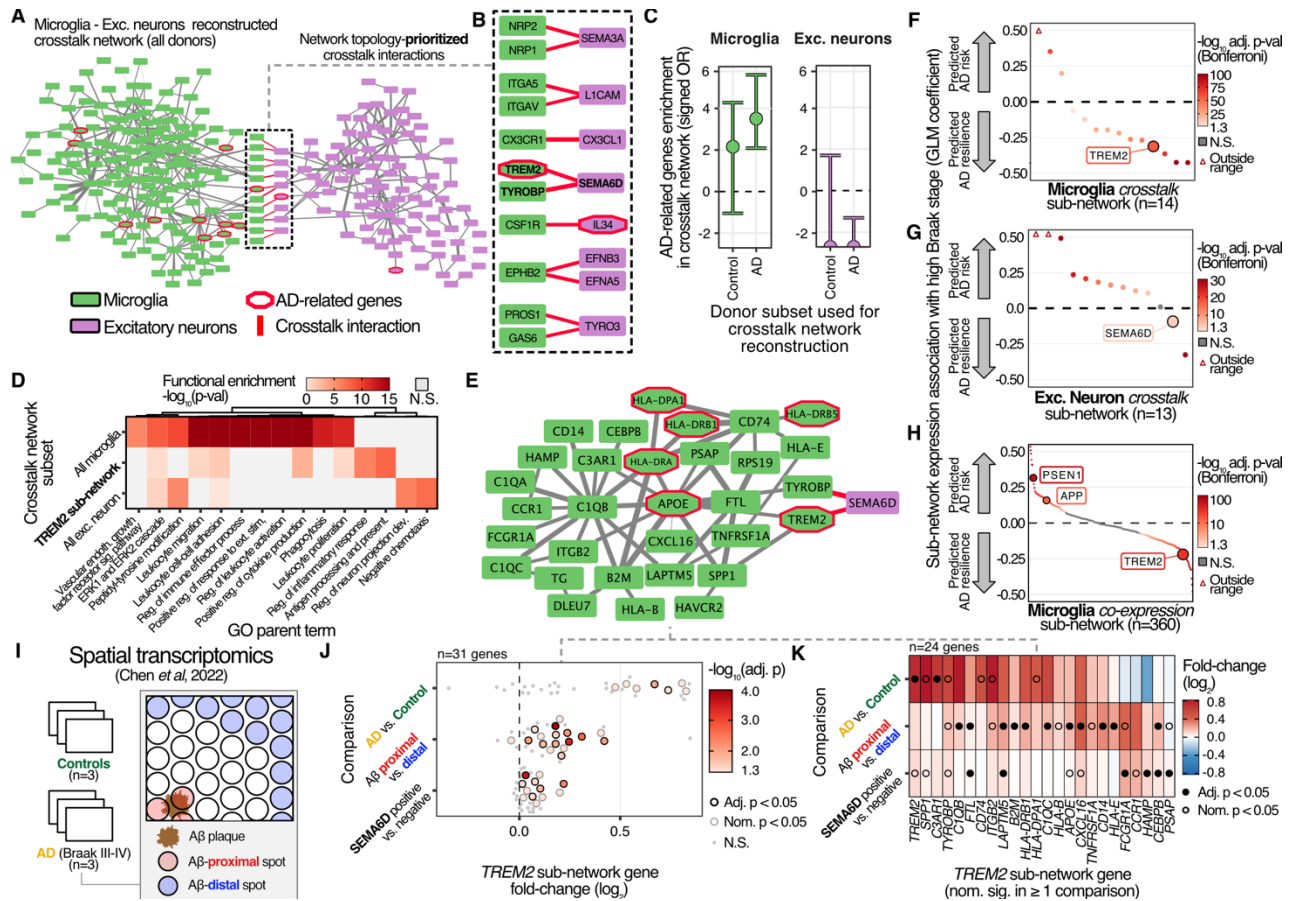

574

575 **Fig. 2: Crosstalk interactions between neurons and microglia are predicted to modulate AD**  
 576 **risk genes.** **A)** Microglia-excitatory neuron crosstalk network inferred by CytoTalk. **B)**  
 577 Prioritized crosstalk interactions using CytoTalk. **C)** Enrichment of AD genes in the microglia  
 578 crosstalk network across donor categories. **D)** GO enrichments for the genes participating in  
 579 microglia and excitatory neurons crosstalk networks. **E)** Predicted TREM2 crosstalk subnetwork  
 580 **F)** Association of microglia crosstalk subnetworks with high Braak stages. **G)** Association of all  
 581 microglia subnetworks with Braak stages. **H)** Association excitatory neuron crosstalk  
 582 subnetworks with high Braak stage. **I)** Spatial transcriptomics validation cohort overview. **J)**  
 583 Changes in gene expression in the TREM2 crosstalk sub-network associated with disease status,  
 584 Aβ plaque proximity, and presence of SEMA6D-expressing cells. **K)** Individual gene view for  
 585 comparisons in (J). GLM: generalized linear model.

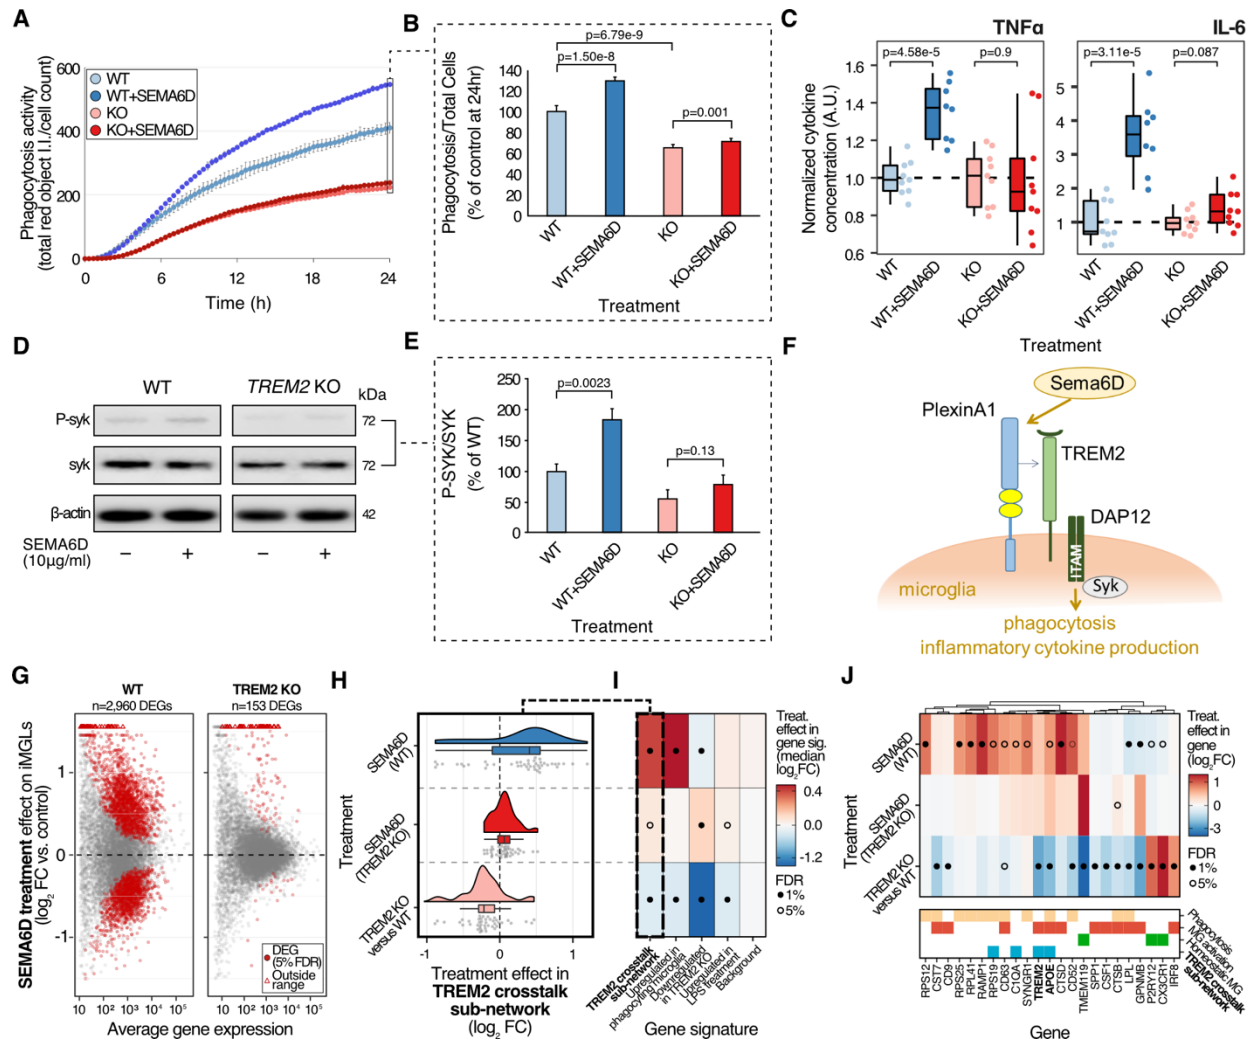

586

587 **Fig. 3. SEMA6D treatment induces microglia activation in a TREM2-dependent manner.**

588 **A)** Phagocytosis of synaptosomes by WT or *TREM2* KO iMGL treated with SEMA6D (5  
589  $\mu$ g/ml). I.I., integrated intensity. Data averaged from three independent experiments (shown in  
590 fig. S12); mean  $\pm$  SD values. **B)** Quantification of phagocytosis of synaptosomes by WT or  
591 *TREM2* KO iMGL treated with SEMA6D at 24 hr. Data represent three independent experiments  
592 performed in triplicate; mean  $\pm$  SEM values at 24 hrs, *p*-values obtained from meta-analyzing the  
593 three experiments. **C)** Quantification of media from WT or *TREM2* KO iMGL treated with  
594 SEMA6D (10  $\mu$ g/ml) for cytokine release of TNF- $\alpha$  and IL-6, using the Mesoscale V-plex  
595 neuroinflammation panel. Boxplots indicate median and interquartile ranges, *p*-values calculated  
596 using linear regression. **D)** Representative western blot analysis of p-SYK and total SYK in WT  
597 and *TREM2* KO iMGL treated with SEMA6D (10  $\mu$ g/ml).  $\beta$ -actin as loading control **E)**  
598 Quantification of p-SYK/total SYK western blot analysis, n=3 (D). **F)** Schematic of the proposed  
599 SEMA6D-TREM2/DAP12 signaling complex. **G)** RNA-seq effect size distribution on  
600 SEMA6D-treated iMGL (WT and *TREM2* KO). **H)** Transcriptional changes in the *TREM2*  
601 crosstalk sub-network associated with SEMA6D treatment (WT or *TREM2* KO vs. untreated  
602 control) or *TREM2* KO (*TREM2* KO vs. WT, no treatment). Only *TREM2* sub-network genes

603 differentially expressed in at least one comparison were included. **I**) Transcriptional effects of  
604 the same conditions as (B) across biologically relevant gene signatures. Background corresponds  
605 to 500 randomly selected genes. Solid dots correspond to a 1% FDR significance threshold for  
606 comparing the effect size distribution to the corresponding background (Mann-Whitney test). **J**)  
607 Transcriptional effects of the experimental conditions across a representative subset of highly  
608 differentially expressed genes from the signatures in (I).

609 **References and Notes:**

- 610 1. D. P. Schafer, E. K. Lehrman, A. G. Kautzman, R. Koyama, A. R. Mardinly, R. Yamasaki, R.  
611 M. Ransohoff, M. E. Greenberg, B. A. Barres, B. Stevens, Microglia sculpt postnatal neural  
612 circuits in an activity and complement-dependent manner. *Neuron* **74**, 691–705 (2012).
- 613 2. D. Fard, L. Tamagnone, Semaphorins in health and disease. *Cytokine Growth Factor Rev* **57**,  
614 55–63 (2021).
- 615 3. V. K. Ramanan, S. L. Risacher, K. Nho, S. Kim, L. Shen, B. C. McDonald, K. K. Yoder, G.  
616 D. Hutchins, J. D. West, E. F. Tallman, S. Gao, T. M. Foroud, M. R. Farlow, P. L. De Jager, D.  
617 A. Bennett, P. S. Aisen, R. C. Petersen, C. R. Jack, A. W. Toga, R. C. Green, W. J. Jagust, M.  
618 W. Weiner, A. J. Saykin, Alzheimer’s Disease Neuroimaging Initiative (ADNI), GWAS of  
619 longitudinal amyloid accumulation on 18F-florbetapir PET in Alzheimer’s disease implicates  
620 microglial activation gene IL1RAP. *Brain* **138**, 3076–3088 (2015).
- 621 4. C. S. McAlpine, J. Park, A. Griciuc, E. Kim, S. H. Choi, Y. Iwamoto, M. G. Kiss, K. A.  
622 Christie, C. Vinegoni, W. C. Poller, J. E. Mindur, C. T. Chan, S. He, H. Janssen, L. P. Wong, J.  
623 Downey, S. Singh, A. Anzai, F. Kahles, M. Jorfi, P. F. Feruglio, R. I. Sadreyev, R. Weissleder,  
624 B. P. Kleinstiver, M. Nahrendorf, R. E. Tanzi, F. K. Swirski, Astrocytic interleukin-3 programs  
625 microglia and limits Alzheimer’s disease. *Nature* (2021), doi:10.1038/s41586-021-03734-6.
- 626 5. I. C. Clark, C. Gutiérrez-Vázquez, M. A. Wheeler, Z. Li, V. Rothhammer, M. Linnerbauer, L.  
627 M. Sanmarco, L. Guo, M. Blain, S. E. J. Zandee, C.-C. Chao, K. V. Batterman, M.  
628 Schwabenland, P. Lotfy, A. Tejada-Velarde, P. Hewson, C. Manganeli Polonio, M. W. Shultis,  
629 Y. Salem, E. C. Tjon, P. H. Fonseca-Castro, D. M. Borucki, K. Alves de Lima, A. Plasencia, A.  
630 R. Abate, D. L. Rosene, K. J. Hodgetts, M. Prinz, J. P. Antel, A. Prat, F. J. Quintana, Barcoded  
631 viral tracing of single-cell interactions in central nervous system inflammation. *Science* **372**,  
632 eabf1230 (2021).
- 633 6. H. Lian, A. Litvinchuk, A. C.-A. Chiang, N. Aithmitti, J. L. Jankowsky, H. Zheng, Astrocyte-  
634 Microglia Cross Talk through Complement Activation Modulates Amyloid Pathology in Mouse  
635 Models of Alzheimer’s Disease. *J Neurosci* **36**, 577–589 (2016).
- 636 7. H. Yin, A. D. Flynn, Drugging Membrane Protein Interactions. *Annu Rev Biomed Eng* **18**, 51–  
637 76 (2016).
- 638 8. J. P. Overington, B. Al-Lazikani, A. L. Hopkins, How many drug targets are there? *Nat Rev*  
639 *Drug Discov* **5**, 993–996 (2006).
- 640 9. T. Worzfeld, S. Offermanns, Semaphorins and plexins as therapeutic targets. *Nat Rev Drug*  
641 *Discov* **13**, 603–621 (2014).
- 642 10. J. C. Lambert, C. A. Ibrahim-Verbaas, D. Harold, A. C. Naj, R. Sims, C. Bellenguez, A. L.  
643 DeStafano, J. C. Bis, G. W. Beecham, B. Grenier-Boley, G. Russo, T. A. Thornton-Wells, N.  
644 Jones, A. V. Smith, V. Chouraki, C. Thomas, M. A. Ikram, D. Zelenika, B. N. Vardarajan, Y.  
645 Kamatani, C. F. Lin, A. Gerrish, H. Schmidt, B. Kunkle, M. L. Dunstan, A. Ruiz, M. T.  
646 Bihoreau, S. H. Choi, C. Reitz, F. Pasquier, C. Cruchaga, D. Craig, N. Amin, C. Berr, O. L.

647 Lopez, P. L. De Jager, V. Deramecourt, J. A. Johnston, D. Evans, S. Lovestone, L. Letenneur, F.  
648 J. Morón, D. C. Rubinsztein, G. Eiriksdottir, K. Sleegers, A. M. Goate, N. Fiévet, M. W.  
649 Huentelman, M. Gill, K. Brown, M. I. Kamboh, L. Keller, P. Barberger-Gateau, B. McGuiness,  
650 E. B. Larson, R. Green, A. J. Myers, C. Dufouil, S. Todd, D. Wallon, S. Love, E. Rogaeva, J.  
651 Gallacher, P. St George-Hyslop, J. Clarimon, A. Lleo, A. Bayer, D. W. Tsuang, L. Yu, M.  
652 Tsolaki, P. Bossù, G. Spalletta, P. Proitsi, J. Collinge, S. Sorbi, F. Sanchez-Garcia, N. C. Fox, J.  
653 Hardy, M. C. Deniz Naranjo, P. Bosco, R. Clarke, C. Brayne, D. Galimberti, M. Mancuso, F.  
654 Matthews, European Alzheimer's Disease Initiative (EADI), Genetic and Environmental Risk in  
655 Alzheimer's Disease, Alzheimer's Disease Genetic Consortium, Cohorts for Heart and Aging  
656 Research in Genomic Epidemiology, S. Moebus, P. Mecocci, M. Del Zompo, W. Maier, H.  
657 Hampel, A. Pilotto, M. Bullido, F. Panza, P. Caffarra, B. Nacmias, J. R. Gilbert, M. Mayhaus, L.  
658 Lannefelt, H. Hakonarson, S. Pichler, M. M. Carrasquillo, M. Ingelsson, D. Beekly, V. Alvarez,  
659 F. Zou, O. Valladares, S. G. Younkin, E. Coto, K. L. Hamilton-Nelson, W. Gu, C. Razquin, P.  
660 Pastor, I. Mateo, M. J. Owen, K. M. Faber, P. V. Jonsson, O. Combarros, M. C. O'Donovan, L.  
661 B. Cantwell, H. Soininen, D. Blacker, S. Mead, T. H. Mosley, D. A. Bennett, T. B. Harris, L.  
662 Fratiglioni, C. Holmes, R. F. de Bruijn, P. Passmore, T. J. Montine, K. Bettens, J. I. Rotter, A.  
663 Brice, K. Morgan, T. M. Foroud, W. A. Kukull, D. Hannequin, J. F. Powell, M. A. Nalls, K.  
664 Ritchie, K. L. Lunetta, J. S. Kauwe, E. Boerwinkle, M. Riemenschneider, M. Boada, M.  
665 Hiltunen, E. R. Martin, R. Schmidt, D. Rujescu, L. S. Wang, J. F. Dartigues, R. Mayeux, C.  
666 Tzourio, A. Hofman, M. M. Nöthen, C. Graff, B. M. Psaty, L. Jones, J. L. Haines, P. A.  
667 Holmans, M. Lathrop, M. A. Pericak-Vance, L. J. Launer, L. A. Farrer, C. M. van Duijn, C. Van  
668 Broeckhoven, V. Moskvina, S. Seshadri, J. Williams, G. D. Schellenberg, P. Amouyel, Meta-  
669 analysis of 74,046 individuals identifies 11 new susceptibility loci for Alzheimer's disease. *Nat*  
670 *Genet* **45**, 1452–1458 (2013).

671 11. B. W. Kunkle, B. Grenier-Boley, R. Sims, J. C. Bis, V. Damotte, A. C. Naj, A. Boland, M.  
672 Vronskaya, S. J. van der Lee, A. Amlie-Wolf, C. Bellenguez, A. Frizatti, V. Chouraki, E. R.  
673 Martin, K. Sleegers, N. Badarinarayan, J. Jakobsdottir, K. L. Hamilton-Nelson, S. Moreno-Grau,  
674 R. Olaso, R. Raybould, Y. Chen, A. B. Kuzma, M. Hiltunen, T. Morgan, S. Ahmad, B. N.  
675 Vardarajan, J. Epelbaum, P. Hoffmann, M. Boada, G. W. Beecham, J.-G. Garnier, D. Harold, A.  
676 L. Fitzpatrick, O. Valladares, M.-L. Moutet, A. Gerrish, A. V. Smith, L. Qu, D. Bacq, N.  
677 Denning, X. Jian, Y. Zhao, M. Del Zompo, N. C. Fox, S.-H. Choi, I. Mateo, J. T. Hughes, H. H.  
678 Adams, J. Malamon, F. Sanchez-Garcia, Y. Patel, J. A. Brody, B. A. Dombroski, M. C. D.  
679 Naranjo, M. Daniilidou, G. Eiriksdottir, S. Mukherjee, D. Wallon, J. Uphill, T. Aspelund, L. B.  
680 Cantwell, F. Garzia, D. Galimberti, E. Hofer, M. Butkiewicz, B. Fin, E. Scarpini, C. Sarnowski,  
681 W. S. Bush, S. Meslage, J. Kornhuber, C. C. White, Y. Song, R. C. Barber, S. Engelborghs, S.  
682 Sordon, D. Voijnovic, P. M. Adams, R. Vandenberghe, M. Mayhaus, L. A. Cupples, M. S.  
683 Albert, P. P. De Deyn, W. Gu, J. J. Himali, D. Beekly, A. Squassina, A. M. Hartmann, A.  
684 Orellana, D. Blacker, E. Rodriguez-Rodriguez, S. Lovestone, M. E. Garcia, R. S. Doody, C.  
685 Munoz-Fernandez, R. Sussams, H. Lin, T. J. Fairchild, Y. A. Benito, C. Holmes, H. Karamujčić-  
686 Čomić, M. P. Frosch, H. Thonberg, W. Maier, G. Roshchupkin, B. Ghetti, V. Giedraitis, A.  
687 Kawalia, S. Li, R. M. Huebinger, L. Kilander, S. Moebus, I. Hernández, M. I. Kamboh, R.  
688 Brundin, J. Turton, Q. Yang, M. J. Katz, L. Concari, J. Lord, A. S. Beiser, C. D. Keene, S.  
689 Helisalmi, I. Kloszewska, W. A. Kukull, A. M. Koivisto, A. Lynch, L. Tarraga, E. B. Larson, A.  
690 Haapasalo, B. Lawlor, T. H. Mosley, R. B. Lipton, V. Solfrizzi, M. Gill, W. T. Longstreth, T. J.  
691 Montine, V. Frisardi, M. Diez-Fairen, F. Rivadeneira, R. C. Petersen, V. Deramecourt, I.  
692 Alvarez, F. Salani, A. Ciamella, E. Boerwinkle, E. M. Reiman, N. Fievet, J. I. Rotter, J. S.

693 Reisch, O. Hanon, C. Cupidi, A. G. Andre Uitterlinden, D. R. Royall, C. Dufouil, R. G. Maletta,  
694 I. de Rojas, M. Sano, A. Brice, R. Cecchetti, P. S. George-Hyslop, K. Ritchie, M. Tsolaki, D. W.  
695 Tsuang, B. Dubois, D. Craig, C.-K. Wu, H. Soininen, D. Avramidou, R. L. Albin, L. Fratiglioni,  
696 A. Germanou, L. G. Apostolova, L. Keller, M. Koutroumani, S. E. Arnold, F. Panza, O.  
697 Gkatzima, S. Asthana, D. Hannequin, P. Whitehead, C. S. Atwood, P. Caffarra, H. Hampel, I.  
698 Quintela, Á. Carracedo, L. Lannfelt, D. C. Rubinsztein, L. L. Barnes, F. Pasquier, L. Frölich, S.  
699 Barral, B. McGuinness, T. G. Beach, J. A. Johnston, J. T. Becker, P. Passmore, E. H. Bigio, J.  
700 M. Schott, T. D. Bird, J. D. Warren, B. F. Boeve, M. K. Lupton, J. D. Bowen, P. Proitsi, A.  
701 Boxer, J. F. Powell, J. R. Burke, J. S. K. Kauwe, J. M. Burns, M. Mancuso, J. D. Buxbaum, U.  
702 Bonuccelli, N. J. Cairns, A. McQuillin, C. Cao, G. Livingston, C. S. Carlson, N. J. Bass, C. M.  
703 Carlsson, J. Hardy, R. M. Carney, J. Bras, M. M. Carrasquillo, R. Guerreiro, M. Allen, H. C.  
704 Chui, E. Fisher, C. Masullo, E. A. Crocco, C. DeCarli, G. Bisceglia, M. Dick, L. Ma, R. Duara,  
705 N. R. Graff-Radford, D. A. Evans, A. Hodges, K. M. Faber, M. Scherer, K. B. Fallon, M.  
706 Riemenschneider, D. W. Fardo, R. Heun, M. R. Farlow, H. Kölsch, S. Ferris, M. Leber, T. M.  
707 Foroud, I. Heuser, D. R. Galasko, I. Giegling, M. Gearing, M. Hüll, D. H. Geschwind, J. R.  
708 Gilbert, J. Morris, R. C. Green, K. Mayo, J. H. Growdon, T. Feulner, R. L. Hamilton, L. E.  
709 Harrell, D. Dricchel, L. S. Honig, T. D. Cushion, M. J. Huentelman, P. Hollingworth, C. M.  
710 Hulette, B. T. Hyman, R. Marshall, G. P. Jarvik, A. Meggy, E. Abner, G. E. Menzies, L.-W. Jin,  
711 G. Leonenko, L. M. Real, G. R. Jun, C. T. Baldwin, D. Grozeva, A. Karydas, G. Russo, J. A.  
712 Kaye, R. Kim, F. Jessen, N. W. Kowall, B. Vellas, J. H. Kramer, E. Vardy, F. M. LaFerla, K.-H.  
713 Jöckel, J. J. Lah, M. Dichgans, J. B. Leverenz, D. Mann, A. I. Levey, S. Pickering-Brown, A. P.  
714 Lieberman, N. Klopp, K. L. Lunetta, H.-E. Wichmann, C. G. Lyketsos, K. Morgan, D. C.  
715 Marson, K. Brown, F. Martiniuk, C. Medway, D. C. Mash, M. M. Nöthen, E. Masliah, N. M.  
716 Hooper, W. C. McCormick, A. Daniele, S. M. McCurry, A. Bayer, A. N. McDavid, J. Gallacher,  
717 A. C. McKee, H. van den Bussche, M. Mesulam, C. Brayne, B. L. Miller, S. Riedel-Heller, C. A.  
718 Miller, J. W. Miller, A. Al-Chalabi, J. C. Morris, C. E. Shaw, A. J. Myers, J. Wiltfang, S.  
719 O'Bryant, J. M. Olichney, V. Alvarez, J. E. Parisi, A. B. Singleton, H. L. Paulson, J. Collinge,  
720 W. R. Perry, S. Mead, E. Peskind, D. H. Cribbs, M. Rossor, A. Pierce, N. S. Ryan, W. W. Poon,  
721 B. Nacmias, H. Potter, S. Sorbi, J. F. Quinn, E. Sacchinelli, A. Raj, G. Spalletta, M. Raskind, C.  
722 Caltagirone, P. Bossù, M. D. Orfei, B. Reisberg, R. Clarke, C. Reitz, A. D. Smith, J. M.  
723 Ringman, D. Warden, E. D. Roberson, G. Wilcock, E. Rogaeva, A. C. Bruni, H. J. Rosen, M.  
724 Gallo, R. N. Rosenberg, Y. Ben-Shlomo, M. A. Sager, P. Mecocci, A. J. Saykin, P. Pastor, M. L.  
725 Cuccaro, J. M. Vance, J. A. Schneider, L. S. Schneider, S. Slifer, W. W. Seeley, A. G. Smith, J.  
726 A. Sonnen, S. Spina, R. A. Stern, R. H. Swerdlow, M. Tang, R. E. Tanzi, J. Q. Trojanowski, J. C.  
727 Troncoso, V. M. Van Deerlin, L. J. Van Eldik, H. V. Vinters, J. P. Vonsattel, S. Weintraub, K.  
728 A. Welsh-Bohmer, K. C. Wilhelmsen, J. Williamson, T. S. Wingo, R. L. Woltjer, C. B. Wright,  
729 C.-E. Yu, L. Yu, Y. Saba, A. Pilotto, M. J. Bullido, O. Peters, P. K. Crane, D. Bennett, P. Bosco,  
730 E. Coto, V. Boccardi, P. L. De Jager, A. Lleo, N. Warner, O. L. Lopez, M. Ingelsson, P.  
731 Deloukas, C. Cruchaga, C. Graff, R. Gwilliam, M. Fornage, A. M. Goate, P. Sanchez-Juan, P. G.  
732 Kehoe, N. Amin, N. Ertekin-Taner, C. Berr, S. DeBette, S. Love, L. J. Launer, S. G. Younkin, J.-  
733 F. Dartigues, C. Corcoran, M. A. Ikram, D. W. Dickson, G. Nicolas, D. Champion, J. Tschanz, H.  
734 Schmidt, H. Hakonarson, J. Clarimon, R. Munger, R. Schmidt, L. A. Farrer, C. Van  
735 Broeckhoven, M. C. O'Donovan, A. L. DeStefano, L. Jones, J. L. Haines, J.-F. Deleuze, M. J.  
736 Owen, V. Gudnason, R. Mayeux, V. Escott-Price, B. M. Psaty, A. Ramirez, L.-S. Wang, A.  
737 Ruiz, C. M. van Duijn, P. A. Holmans, S. Seshadri, J. Williams, P. Amouyel, G. D.  
738 Schellenberg, J.-C. Lambert, M. A. Pericak-Vance, Genetic meta-analysis of diagnosed

- 739 Alzheimer's disease identifies new risk loci and implicates A $\beta$ , tau, immunity and lipid  
740 processing. *Nat Genet* **51**, 414–430 (2019).
- 741 12. J. Schwartzentruber, S. Cooper, J. Z. Liu, I. Barrio-Hernandez, E. Bello, N. Kumasaka, A. M.  
742 H. Young, R. J. M. Franklin, T. Johnson, K. Estrada, D. J. Gaffney, P. Beltrao, A. Bassett,  
743 Genome-wide meta-analysis, fine-mapping and integrative prioritization implicate new  
744 Alzheimer's disease risk genes. *Nat Genet* **53**, 392–402 (2021).
- 745 13. C. Bellenguez, F. Küçükali, I. E. Jansen, L. Klei, S. Moreno-Grau, N. Amin, A. C.  
746 Naj, R. Campos-Martin, B. Grenier-Boley, V. Andrade, P. A. Holmans, A. Boland, V. Damotte,  
747 S. J. van der Lee, M. R. Costa, T. Kuulasmaa, Q. Yang, I. de Rojas, J. C. Bis, A. Yaqub, I.  
748 Prokic, J. Chapuis, S. Ahmad, V. Giedraitis, D. Aarsland, P. Garcia-Gonzalez, C. Abdelnour, E.  
749 Alarcón-Martín, D. Alcolea, M. Alegret, I. Alvarez, V. Álvarez, N. J. Armstrong, A. Tsolaki, C.  
750 Antúnez, I. Appollonio, M. Arcaro, S. Archetti, A. A. Pastor, B. Arosio, L. Athanasiu, H. Bailly,  
751 N. Banaj, M. Baquero, S. Barral, A. Beiser, A. B. Pastor, J. E. Below, P. Benček, L. Benussi, C.  
752 Berr, C. Besse, V. Bessi, G. Binetti, A. Bizarro, R. Blesa, M. Boada, E. Boerwinkle, B. Borroni,  
753 S. Boschi, P. Bossù, G. Bråthen, J. Bressler, C. Bresner, H. Brodaty, K. J. Brookes, L. I. Brusco,  
754 D. Buiza-Rueda, K. Bürger, V. Burholt, W. S. Bush, M. Calero, L. B. Cantwell, G. Chene, J.  
755 Chung, M. L. Cuccaro, Á. Carracedo, R. Cecchetti, L. Cervera-Carles, C. Charbonnier, H.-H.  
756 Chen, C. Chillotti, S. Ciccone, J. A. H. R. Claassen, C. Clark, E. Conti, A. Corma-Gómez, E.  
757 Costantini, C. Custodero, D. Daian, M. C. Dalmasso, A. Daniele, E. Dardiotis, J.-F. Dartigues, P.  
758 P. de Deyn, K. de Paiva Lopes, L. D. de Witte, S. Debette, J. Deckert, T. Del Ser, N. Denning, A.  
759 DeStefano, M. Dichgans, J. Diehl-Schmid, M. Diez-Fairen, P. D. Rossi, S. Djurovic, E. Duron,  
760 E. Düzel, C. Dufouil, G. Eiriksdottir, S. Engelborghs, V. Escott-Price, A. Espinosa, M. Ewers, K.  
761 M. Faber, T. Fabrizio, S. F. Nielsen, D. W. Fardo, L. Farotti, C. Fenoglio, M. Fernández-Fuertes,  
762 R. Ferrari, C. B. Ferreira, E. Ferri, B. Fin, P. Fischer, T. Fladby, K. Fließbach, B. Fongang, M.  
763 Fornage, J. Fortea, T. M. Foroud, S. Fostinelli, N. C. Fox, E. Franco-Macías, M. J. Bullido, A.  
764 Frank-García, L. Froelich, B. Fulton-Howard, D. Galimberti, J. M. García-Alberca, P. García-  
765 González, S. Garcia-Madrona, G. Garcia-Ribas, R. Ghidoni, I. Giegling, G. Giorgio, A. M.  
766 Goate, O. Goldhardt, D. Gomez-Fonseca, A. González-Pérez, C. Graff, G. Grande, E. Green, T.  
767 Grimmer, E. Grünblatt, M. Grunin, V. Gudnason, T. Guetta-Baranes, A. Haapasalo, G.  
768 Hadjigeorgiou, J. L. Haines, K. L. Hamilton-Nelson, H. Hampel, O. Hanon, J. Hardy, A. M.  
769 Hartmann, L. Hausner, J. Harwood, S. Heilmann-Heimbach, S. Helisalmi, M. T. Heneka, I.  
770 Hernández, M. J. Herrmann, P. Hoffmann, C. Holmes, H. Holstege, R. H. Vilas, M. Hulsman, J.  
771 Humphrey, G. J. Biessels, X. Jian, C. Johansson, G. R. Jun, Y. Kastumata, J. Kauwe, P. G.  
772 Kehoe, L. Kilander, A. K. Ståhlbom, M. Kivipelto, A. Koivisto, J. Kornhuber, M. H. Kosmidis,  
773 W. A. Kukull, P. P. Kuksa, B. W. Kunkle, A. B. Kuzma, C. Lage, E. J. Laukka, L. Launer, A.  
774 Lauria, C.-Y. Lee, J. Lehtisalo, O. Lerch, A. Lleó, W. Longstreth, O. Lopez, A. L. de Munain, S.  
775 Love, M. Löwemark, L. Luckcuck, K. L. Lunetta, Y. Ma, J. Macías, C. A. MacLeod, W. Maier,  
776 F. Mangialasche, M. Spallazzi, M. Marquié, R. Marshall, E. R. Martin, A. M. Montes, C. M.  
777 Rodríguez, C. Masullo, R. Mayeux, S. Mead, P. Mecocci, M. Medina, A. Meggy, S. Mehrabian,  
778 S. Mendoza, M. Menéndez-González, P. Mir, S. Moebus, M. Mol, L. Molina-Porcel, L.  
779 Montreal, L. Morelli, F. Moreno, K. Morgan, T. Mosley, M. M. Nöthen, C. Muchnik, S.  
780 Mukherjee, B. Nacmias, T. Ngandu, G. Nicolas, B. G. Nordestgaard, R. Olaso, A. Orellana, M.  
781 Orsini, G. Ortega, A. Padovani, C. Paolo, G. Papenberg, L. Parnetti, F. Pasquier, P. Pastor, G.  
782 Peloso, A. Pérez-Cordón, J. Pérez-Tur, P. Pericard, O. Peters, Y. A. L. Pijnenburg, J. A. Pineda,  
783 G. Piñol-Ripoll, C. Pisanu, T. Polak, J. Popp, D. Posthuma, J. Priller, R. Puerta, O. Quenez, I.



- 784 Quintela, J. Q. Thomassen, A. Rábano, I. Rainero, F. Rajabli, I. Ramakers, L. M. Real, M. J. T.  
785 Reinders, C. Reitz, D. Reyes-Dumeyer, P. Ridge, S. Riedel-Heller, P. Riederer, N. Roberto, E.  
786 Rodriguez-Rodriguez, A. Rongve, I. R. Allende, M. Rosende-Roca, J. L. Royo, E. Rubino, D.  
787 Rujescu, M. E. Sáez, P. Sakka, I. Saltvedt, Á. Sanabria, M. B. Sánchez-Arjona, F. Sanchez-  
788 Garcia, P. S. Juan, R. Sánchez-Valle, S. B. Sando, C. Sarnowski, C. L. Satizabal, M. Scamosci,  
789 N. Scarmeas, E. Scarpini, P. Scheltens, N. Scherbaum, M. Scherer, M. Schmid, A. Schneider, J.  
790 M. Schott, G. Selbæk, D. Seripa, M. Serrano, J. Sha, A. A. Shadrin, O. Skrobot, S. Slifer, G. J. L.  
791 Snijders, H. Soininen, V. Solfrizzi, A. Solomon, Y. Song, S. Sorbi, O. Sotolongo-Grau, G.  
792 Spalletta, A. Spottke, A. Squassina, E. Stordal, J. P. Tartan, L. Tárraga, N. Tesí, A. Thalamuthu,  
793 T. Thomas, G. Tosto, L. Traykov, L. Tremolizzo, A. Tybjærg-Hansen, A. Uitterlinden, A.  
794 Ullgren, I. Ulstein, S. Valero, O. Valladares, C. V. Broeckhoven, J. Vance, B. N. Vardarajan, A.  
795 van der Lugt, J. V. Dongen, J. van Rooij, J. van Swieten, R. Vandenberghe, F. Verhey, J.-S.  
796 Vidal, J. Vogelgsang, M. Vyhnaek, M. Wagner, D. Wallon, L.-S. Wang, R. Wang, L. Weinhold,  
797 J. Wiltfang, G. Windle, B. Woods, M. Yannakoulia, H. Zare, Y. Zhao, X. Zhang, C. Zhu, M.  
798 Zulaica, EADB, GR@ACE, DEGESCO, EADI, GERAD, Demgene, FinnGen, ADGC,  
799 CHARGE, L. A. Farrer, B. M. Psaty, M. Ghanbari, T. Raj, P. Sachdev, K. Mather, F. Jessen, M.  
800 A. Ikram, A. de Mendonça, J. Hort, M. Tsolaki, M. A. Pericak-Vance, P. Amouyel, J. Williams,  
801 R. Frikke-Schmidt, J. Clarimon, J.-F. Deleuze, G. Rossi, S. Seshadri, O. A. Andreassen, M.  
802 Ingelsson, M. Hiltunen, K. Sleegers, G. D. Schellenberg, C. M. van Duijn, R. Sims, W. M. van  
803 der Flier, A. Ruiz, A. Ramirez, J.-C. Lambert, New insights into the genetic etiology of  
804 Alzheimer's disease and related dementias. *Nat Genet* (2022), doi:10.1038/s41588-022-01024-z.
- 805 14. L. Brase, S.-F. You, R. D'Oliveira Albanus, J. L. Del-Aguila, Y. Dai, B. C. Novotny, C.  
806 Soriano-Tarraga, T. Dykstra, M. V. Fernandez, J. P. Budde, K. Bergmann, J. C. Morris, R. J.  
807 Bateman, R. J. Perrin, E. McDade, C. Xiong, A. M. Goate, M. Farlow, Dominantly Inherited  
808 Alzheimer Network (DIAN), G. T. Sutherland, J. Kipnis, C. M. Karch, B. A. Benitez, O. Harari,  
809 Single-nucleus RNA-sequencing of autosomal dominant Alzheimer disease and risk variant  
810 carriers. *Nat Commun* **14**, 2314 (2023).
- 811 15. M. Olah, V. Menon, N. Habib, M. F. Taga, Y. Ma, C. J. Yung, M. Cimpean, A. Khairallah,  
812 G. Coronas-Samano, R. Sankowski, D. Grün, A. A. Kroshilina, D. Dionne, R. A. Sarkis, G. R.  
813 Cosgrove, J. Helgager, J. A. Golden, P. B. Pennell, M. Prinz, J. P. G. Vonsattel, A. F. Teich, J.  
814 A. Schneider, D. A. Bennett, A. Regev, W. Elyaman, E. M. Bradshaw, P. L. De Jager, Single cell  
815 RNA sequencing of human microglia uncovers a subset associated with Alzheimer's disease. *Nat*  
816 *Commun* **11**, 6129 (2020).
- 817 16. S.-F. Lau, H. Cao, A. K. Y. Fu, N. Y. Ip, Single-nucleus transcriptome analysis reveals  
818 dysregulation of angiogenic endothelial cells and neuroprotective glia in Alzheimer's disease.  
819 *Proc Natl Acad Sci U S A* **117**, 25800–25809 (2020).
- 820 17. S. Morabito, E. Miyoshi, N. Michael, S. Shahin, A. C. Martini, E. Head, J. Silva, K. Leavy,  
821 M. Perez-Rosendahl, V. Swarup, Single-nucleus chromatin accessibility and transcriptomic  
822 characterization of Alzheimer's disease. *Nat Genet* (2021), doi:10.1038/s41588-021-00894-z.
- 823 18. N. M. Dräger, S. M. Sattler, C. T.-L. Huang, O. M. Teter, K. Leng, S. H. Hashemi, J. Hong,  
824 C. D. Clelland, L. Zhan, L. Kodama, A. B. Singleton, M. A. Nalls, J. Ichida, M. E. Ward, F.  
825 Faghri, L. Gan, M. Kampmann, A CRISPRi/a platform in iPSC-derived microglia uncovers

- 826 *regulators of disease states* (Neuroscience, 2021);  
827 <http://biorxiv.org/lookup/doi/10.1101/2021.06.16.448639>).
- 828 19. Q. Li, B. A. Barres, Microglia and macrophages in brain homeostasis and disease. *Nat Rev*  
829 *Immunol* **18**, 225–242 (2018).
- 830 20. M. Efremova, M. Vento-Tormo, S. A. Teichmann, R. Vento-Tormo, CellPhoneDB: inferring  
831 cell–cell communication from combined expression of multi-subunit ligand–receptor complexes.  
832 *Nat Protoc* **15**, 1484–1506 (2020).
- 833 21. P. J. Paasila, D. S. Davies, J. J. Kril, C. Goldsbury, G. T. Sutherland, The relationship  
834 between the morphological subtypes of microglia and Alzheimer’s disease neuropathology.  
835 *Brain Pathol* **29**, 726–740 (2019).
- 836 22. Y. Zhou, W. M. Song, P. S. Andhey, A. Swain, T. Levy, K. R. Miller, P. L. Poliani, M.  
837 Cominelli, S. Grover, S. Gilfillan, M. Cella, T. K. Ulland, K. Zaitsev, A. Miyashita, T. Ikeuchi,  
838 M. Sainouchi, A. Kakita, D. A. Bennett, J. A. Schneider, M. R. Nichols, S. A. Beausoleil, J. D.  
839 Ulrich, D. M. Holtzman, M. N. Artyomov, M. Colonna, Human and mouse single-nucleus  
840 transcriptomics reveal TREM2-dependent and TREM2-independent cellular responses in  
841 Alzheimer’s disease. *Nat Med* **26**, 131–142 (2020).
- 842 23. I. E. Jansen, J. E. Savage, K. Watanabe, J. Bryois, D. M. Williams, S. Steinberg, J. Sealock,  
843 I. K. Karlsson, S. Hägg, L. Athanasiu, N. Voyle, P. Proitsi, A. Witoelar, S. Stringer, D. Aarsland,  
844 I. S. Almdahl, F. Andersen, S. Bergh, F. Bettella, S. Bjornsson, A. Brækhus, G. Bråthen, C. de  
845 Leeuw, R. S. Desikan, S. Djurovic, L. Dumitrescu, T. Fladby, T. J. Hohman, P. V. Jonsson, S. J.  
846 Kiddle, A. Rongve, I. Saltvedt, S. B. Sando, G. Selbæk, M. Shoai, N. G. Skene, J. Snaedal, E.  
847 Stordal, I. D. Ulstein, Y. Wang, L. R. White, J. Hardy, J. Hjerling-Leffler, P. F. Sullivan, W. M.  
848 van der Flier, R. Dobson, L. K. Davis, H. Stefansson, K. Stefansson, N. L. Pedersen, S. Ripke,  
849 O. A. Andreassen, D. Posthuma, Genome-wide meta-analysis identifies new loci and functional  
850 pathways influencing Alzheimer’s disease risk. *Nat Genet* **51**, 404–413 (2019).
- 851 24. R. E. Marioni, S. E. Harris, Q. Zhang, A. F. McRae, S. P. Hagenaars, W. D. Hill, G. Davies,  
852 C. W. Ritchie, C. R. Gale, J. M. Starr, A. M. Goate, D. J. Porteous, J. Yang, K. L. Evans, I. J.  
853 Deary, N. R. Wray, P. M. Visscher, GWAS on family history of Alzheimer’s disease. *Transl*  
854 *Psychiatry* **8**, 99 (2018).
- 855 25. Y. Deming, F. Filipello, F. Cignarella, C. Cantoni, S. Hsu, R. Mikesell, Z. Li, J. L. Del-  
856 Aguila, U. Dube, F. G. Farias, J. Bradley, J. Budde, L. Ibanez, M. V. Fernandez, K. Blennow, H.  
857 Zetterberg, A. Heslegrave, P. M. Johansson, J. Svensson, B. Nellgård, A. Lleo, D. Alcolea, J.  
858 Clarimon, L. Rami, J. L. Molinuevo, M. Suárez-Calvet, E. Morenas-Rodríguez, G. Kleinberger,  
859 M. Ewers, O. Harari, C. Haass, T. J. Brett, B. A. Benitez, C. M. Karch, L. Piccio, C. Cruchaga,  
860 The MS4A gene cluster is a key modulator of soluble TREM2 and Alzheimer’s disease risk. *Sci*  
861 *Transl Med* **11**, eaa2291 (2019).
- 862 26. Y. Hu, T. Peng, L. Gao, K. Tan, CytoTalk: De novo construction of signal transduction  
863 networks using single-cell transcriptomic data. *Sci. Adv.* **7**, eabf1356 (2021).

- 864 27. Z. Szepesi, O. Manouchehrian, S. Bachiller, T. Deierborg, Bidirectional Microglia-Neuron  
865 Communication in Health and Disease. *Front Cell Neurosci* **12**, 323 (2018).
- 866 28. N. Takegahara, H. Takamatsu, T. Toyofuku, T. Tsujimura, T. Okuno, K. Yukawa, M. Mizui,  
867 M. Yamamoto, D. V. R. Prasad, K. Suzuki, M. Ishii, K. Terai, M. Moriya, Y. Nakatsuji, S.  
868 Sakoda, S. Sato, S. Akira, K. Takeda, M. Inui, T. Takai, M. Ikawa, M. Okabe, A. Kumanogoh,  
869 H. Kikutani, Plexin-A1 and its interaction with DAP12 in immune responses and bone  
870 homeostasis. *Nat Cell Biol* **8**, 615–622 (2006).
- 871 29. N. Thrupp, C. Sala Frigerio, L. Wolfs, N. G. Skene, N. Fattorelli, S. Poovathingal, Y. Fourne,  
872 P. M. Matthews, T. Theys, R. Mancuso, B. de Strooper, M. Fiers, Single-Nucleus RNA-Seq Is  
873 Not Suitable for Detection of Microglial Activation Genes in Humans. *Cell Rep* **32**, 108189  
874 (2020).
- 875 30. X. Wang, Y. He, Q. Zhang, X. Ren, Z. Zhang, Direct Comparative Analyses of 10X  
876 Genomics Chromium and Smart-seq2. *Genomics Proteomics Bioinformatics* **19**, 253–266  
877 (2021).
- 878 31. T. K. Ulland, M. Colonna, TREM2 — a key player in microglial biology and Alzheimer  
879 disease. *Nat Rev Neurol* **14**, 667–675 (2018).
- 880 32. Y. Atagi, C.-C. Liu, M. M. Painter, X.-F. Chen, C. Verbeeck, H. Zheng, X. Li, R.  
881 Rademakers, S. S. Kang, H. Xu, S. Younkin, P. Das, J. D. Fryer, G. Bu, Apolipoprotein E Is a  
882 Ligand for Triggering Receptor Expressed on Myeloid Cells 2 (TREM2). *J Biol Chem* **290**,  
883 26043–26050 (2015).
- 884 33. F. L. Yeh, Y. Wang, I. Tom, L. C. Gonzalez, M. Sheng, TREM2 Binds to Apolipoproteins,  
885 Including APOE and CLU/APOJ, and Thereby Facilitates Uptake of Amyloid-Beta by  
886 Microglia. *Neuron* **91**, 328–340 (2016).
- 887 34. S. M. Neuner, J. Tcw, A. M. Goate, Genetic architecture of Alzheimer’s disease. *Neurobiol*  
888 *Dis* **143**, 104976 (2020).
- 889 35. E. Rogaeva, Y. Meng, J. H. Lee, Y. Gu, T. Kawarai, F. Zou, T. Katayama, C. T. Baldwin, R.  
890 Cheng, H. Hasegawa, F. Chen, N. Shibata, K. L. Lunetta, R. Pardossi-Piquard, C. Bohm, Y.  
891 Wakutani, L. A. Cupples, K. T. Cuenco, R. C. Green, L. Pinessi, I. Rainero, S. Sorbi, A. Bruni,  
892 R. Duara, R. P. Friedland, R. Inzelberg, W. Hampe, H. Bujo, Y.-Q. Song, O. M. Andersen, T. E.  
893 Willnow, N. Graff-Radford, R. C. Petersen, D. Dickson, S. D. Der, P. E. Fraser, G. Schmitt-  
894 Ulms, S. Younkin, R. Mayeux, L. A. Farrer, P. St George-Hyslop, The neuronal sortilin-related  
895 receptor SORL1 is genetically associated with Alzheimer disease. *Nat Genet* **39**, 168–177  
896 (2007).
- 897 36. R.-H. Yin, J.-T. Yu, L. Tan, The Role of SORL1 in Alzheimer’s Disease. *Mol Neurobiol* **51**,  
898 909–918 (2015).
- 899 37. S. Chen, Y. Chang, L. Li, D. Acosta, Y. Li, Q. Guo, C. Wang, E. Turkes, C. Morrison, D.  
900 Julian, M. E. Hester, D. W. Scharre, C. Santiskulvong, S. X. Song, J. T. Plummer, G. E. Serrano,  
901 T. G. Beach, K. E. Duff, Q. Ma, H. Fu, Spatially resolved transcriptomics reveals genes

- 902 associated with the vulnerability of middle temporal gyrus in Alzheimer's disease. *Acta*  
903 *Neuropathol Commun* **10**, 188 (2022).
- 904 38. H. Keren-Shaul, A. Spinrad, A. Weiner, O. Matcovitch-Natan, R. Dvir-Szternfeld, T. K.  
905 Ulland, E. David, K. Baruch, D. Lara-Astaiso, B. Toth, S. Itzkovitz, M. Colonna, M. Schwartz, I.  
906 Amit, A Unique Microglia Type Associated with Restricting Development of Alzheimer's  
907 Disease. *Cell* **169**, 1276-1290.e17 (2017).
- 908 39. A. McQuade, M. Coburn, C. H. Tu, J. Hasselmann, H. Davtyan, M. Blurton-Jones,  
909 Development and validation of a simplified method to generate human microglia from  
910 pluripotent stem cells. *Mol Neurodegener* **13**, 67 (2018).
- 911 40. W.-Y. Wang, M.-S. Tan, J.-T. Yu, L. Tan, Role of pro-inflammatory cytokines released from  
912 microglia in Alzheimer's disease. *Ann Transl Med* **3**, 136 (2015).
- 913 41. A. Grubman, X. Y. Choo, G. Chew, J. F. Ouyang, G. Sun, N. P. Croft, F. J. Rossello, R.  
914 Simmons, S. Buckberry, D. V. Landin, J. Pflueger, T. H. Vandekolk, Z. Abay, Y. Zhou, X. Liu,  
915 J. Chen, M. Larcombe, J. M. Haynes, C. McLean, S. Williams, S. Y. Chai, T. Wilson, R. Lister,  
916 C. W. Pouton, A. W. Purcell, O. J. L. Rackham, E. Petretto, J. M. Polo, Transcriptional signature  
917 in microglia associated with A $\beta$  plaque phagocytosis. *Nat Commun* **12**, 3015 (2021).
- 918 42. S. Safaiyan, S. Besson-Girard, T. Kaya, L. Cantuti-Castelvetri, L. Liu, H. Ji, M. Schifferer,  
919 G. Gouna, F. Usifo, N. Kannaiyan, D. Fitzner, X. Xiang, M. J. Rossner, M. Brendel, O. Gokce,  
920 M. Simons, White matter aging drives microglial diversity. *Neuron* **109**, 1100-1117.e10 (2021).
- 921 43. T. R. Jay, V. E. von Saucken, G. E. Landreth, TREM2 in Neurodegenerative Diseases. *Mol*  
922 *Neurodegener* **12**, 56 (2017).
- 923 44. A. McQuade, Y. J. Kang, J. Hasselmann, A. Jairaman, A. Sotelo, M. Coburn, S. K.  
924 Shabestari, J. P. Chadarevian, G. Fote, C. H. Tu, E. Danhash, J. Silva, E. Martinez, C. Cotman,  
925 G. A. Prieto, L. M. Thompson, J. S. Steffan, I. Smith, H. Davtyan, M. Cahalan, H. Cho, M.  
926 Blurton-Jones, Gene expression and functional deficits underlie TREM2-knockout microglia  
927 responses in human models of Alzheimer's disease. *Nat Commun* **11**, 5370 (2020).
- 928 45. A. Kumanogoh, H. Kikutani, Immunological functions of the neuropilins and plexins as  
929 receptors for semaphorins. *Nat Rev Immunol* **13**, 802–814 (2013).
- 930 46. G. Jun, H. Asai, E. Zeldich, E. Drapeau, C. Chen, J. Chung, J.-H. Park, S. Kim, V.  
931 Haroutunian, T. Foroud, R. Kuwano, J. L. Haines, M. A. Pericak-Vance, G. D. Schellenberg, K.  
932 L. Lunetta, J.-W. Kim, J. D. Buxbaum, R. Mayeux, T. Ikezu, C. R. Abraham, L. A. Farrer,  
933 PLXNA4 is associated with Alzheimer disease and modulates tau phosphorylation. *Ann Neurol*  
934 **76**, 379–392 (2014).
- 935 47. P. F. Good, D. Alapat, A. Hsu, C. Chu, D. Perl, X. Wen, D. E. Burstein, D. S. Kohtz, A role  
936 for semaphorin 3A signaling in the degeneration of hippocampal neurons during Alzheimer's  
937 disease. *J Neurochem* **91**, 716–736 (2004).

- 938 48. F. Nakamura, R. G. Kalb, S. M. Strittmatter, Molecular basis of semaphorin-mediated axon  
939 guidance. *J Neurobiol* **44**, 219–229 (2000).
- 940 49. S. S. Kang, A. Kurti, A. Wojtas, K. E. Baker, C.-C. Liu, T. Kanekiyo, Y. Deming, C.  
941 Cruchaga, S. Estus, G. Bu, J. D. Fryer, Identification of plexin A4 as a novel clusterin receptor  
942 links two Alzheimer’s disease risk genes. *Hum Mol Genet* **25**, 3467–3475 (2016).
- 943 50. E. E. Evans, V. Mishra, C. Mallow, E. M. Gersz, L. Balch, A. Howell, C. Reilly, E. S. Smith,  
944 T. L. Fisher, M. Zauderer, Semaphorin 4D is upregulated in neurons of diseased brains and  
945 triggers astrocyte reactivity. *J Neuroinflammation* **19**, 200 (2022).
- 946 51. T. Ito, K. Yoshida, T. Negishi, M. Miyajima, H. Takamatsu, H. Kikutani, A. Kumanogoh, K.  
947 Yukawa, Plexin-A1 is required for Toll-like receptor-mediated microglial activation in the  
948 development of lipopolysaccharide-induced encephalopathy. *Int J Mol Med* **33**, 1122–1130  
949 (2014).
- 950 52. J. Klesney-Tait, I. R. Turnbull, M. Colonna, The TREM receptor family and signal  
951 integration. *Nat Immunol* **7**, 1266–1273 (2006).
- 952 53. D. L. Kober, T. J. Brett, TREM2-Ligand Interactions in Health and Disease. *J Mol Biol* **429**,  
953 1607–1629 (2017).
- 954 54. S. Chung, J. Yang, H. J. Kim, E. M. Hwang, W. Lee, K. Suh, H. Choi, I. Mook-Jung, Plexin-  
955 A4 mediates amyloid- $\beta$ -induced tau pathology in Alzheimer’s disease animal model. *Prog*  
956 *Neurobiol* **203**, 102075 (2021).
- 957 55. S. S. Kang, A. Kurti, A. Wojtas, K. E. Baker, C.-C. Liu, T. Kanekiyo, Y. Deming, C.  
958 Cruchaga, S. Estus, G. Bu, J. D. Fryer, Identification of plexin A4 as a novel clusterin receptor  
959 links two Alzheimer’s disease risk genes. *Hum Mol Genet* **25**, 3467–3475 (2016).
- 960 56. S. Kang, Y. Nakanishi, Y. Kioi, D. Okuzaki, T. Kimura, H. Takamatsu, S. Koyama, S.  
961 Nojima, M. Nishide, Y. Hayama, Y. Kinehara, Y. Kato, T. Nakatani, T. Shimogori, J. Takagi, T.  
962 Toyofuku, A. Kumanogoh, Semaphorin 6D reverse signaling controls macrophage lipid  
963 metabolism and anti-inflammatory polarization. *Nat Immunol* **19**, 561–570 (2018).
- 964 57. A. Kumanogoh, H. Kikutani, Immunological functions of the neuropilins and plexins as  
965 receptors for semaphorins. *Nature Reviews. Immunology* **13**, 802–14 (2013).
- 966 58. Q. Han, Y.-A. Sun, Y. Zong, C. Chen, H.-F. Wang, L. Tan, Alzheimer’s Disease  
967 Neuroimaging Initiative, Common Variants in PLXNA4 and Correlation to CSF-related  
968 Phenotypes in Alzheimer’s Disease. *Frontiers in Neuroscience* **12** (2018) (available at  
969 <https://www.frontiersin.org/articles/10.3389/fnins.2018.00946>).
- 970 59. A. Macedo, C. Gómez, M. Â. Rebelo, J. Poza, I. Gomes, S. Martins, A. Maturana-Candelas,  
971 V. G. Pablo, L. Durães, P. Sousa, M. Figueruelo, M. Rodríguez, C. Pita, M. Arenas, L. Álvarez,  
972 R. Hornero, A. M. Lopes, N. Pinto, Risk Variants in Three Alzheimer’s Disease Genes Show  
973 Association with EEG Endophenotypes. *J Alzheimers Dis* **80**, 209–223 (2021).

- 974 60. Y. Deming, Z. Li, M. Kapoor, O. Harari, J. L. Del-Aguila, K. Black, D. Carrell, Y. Cai, M.  
975 V. Fernandez, J. Budde, S. Ma, B. Saef, B. Howells, K.-L. Huang, S. Bertelsen, A. M. Fagan, D.  
976 M. Holtzman, J. C. Morris, S. Kim, A. J. Saykin, P. L. De Jager, M. Albert, A. Moghekar, R.  
977 O'Brien, M. Riemenschneider, R. C. Petersen, K. Blennow, H. Zetterberg, L. Minthon, V. M.  
978 Van Deerlin, V. M.-Y. Lee, L. M. Shaw, J. Q. Trojanowski, G. Schellenberg, J. L. Haines, R.  
979 Mayeux, M. A. Pericak-Vance, L. A. Farrer, E. R. Peskind, G. Li, A. F. Di Narzo, Alzheimer's  
980 Disease Neuroimaging Initiative (ADNI), Alzheimer Disease Genetic Consortium (ADGC), J. S.  
981 K. Kauwe, A. M. Goate, C. Cruchaga, Genome-wide association study identifies four novel loci  
982 associated with Alzheimer's endophenotypes and disease modifiers. *Acta Neuropathol* **133**, 839–  
983 856 (2017).
- 984 61. A. Zettergren, K. Höglund, S. Kern, V. Thorvaldsson, M. Johan Skoog, O. Hansson, N.  
985 Andreasen, N. Bogdanovic, K. Blennow, I. Skoog, H. Zetterberg, Association of IL1RAP-related  
986 genetic variation with cerebrospinal fluid concentration of Alzheimer-associated tau protein. *Sci*  
987 *Rep* **9**, 2460 (2019).
- 988 62. F. Su, F. Bai, Z. Zhang, Inflammatory Cytokines and Alzheimer's Disease: A Review from  
989 the Perspective of Genetic Polymorphisms. *Neurosci Bull* **32**, 469–480 (2016).
- 990 63. G. Ogunmokun, S. Dewanjee, P. Chakraborty, C. Valupadas, A. Chaudhary, V. Kolli, U.  
991 Anand, J. Vallamkondu, P. Goel, H. P. R. Paluru, K. D. Gill, P. H. Reddy, V. De Feo, R.  
992 Kandimalla, The Potential Role of Cytokines and Growth Factors in the Pathogenesis of  
993 Alzheimer's Disease. *Cells* **10**, 2790 (2021).
- 994 64. A. S. Mendiola, A. E. Cardona, The IL-1 $\beta$  phenomena in neuroinflammatory diseases. *J*  
995 *Neural Transm (Vienna)* **125**, 781–795 (2018).
- 996 65. A. Patel, A. Garcia Diaz, J. C. Moore, D. Sirabella, B. Corneo, Establishment and  
997 characterization of two iPSC lines derived from healthy controls. *Stem Cell Res* **47**, 101926  
998 (2020).
- 999 66. W. B. Stine, K. N. Dahlgren, G. A. Krafft, M. J. LaDu, In vitro characterization of conditions  
1000 for amyloid-beta peptide oligomerization and fibrillogenesis. *J Biol Chem* **278**, 11612–11622  
1001 (2003).
- 1002 67. H. Mathys, J. Davila-Velderrain, Z. Peng, F. Gao, S. Mohammadi, J. Z. Young, M. Menon,  
1003 L. He, F. Abdurrob, X. Jiang, A. J. Martorell, R. M. Ransohoff, B. P. Hafler, D. A. Bennett, M.  
1004 Kellis, L.-H. Tsai, Single-cell transcriptomic analysis of Alzheimer's disease. *Nature* **570**, 332–  
1005 337 (2019).
- 1006 68. T. Stuart, A. Butler, P. Hoffman, C. Hafemeister, E. Papalexi, W. M. Mauck, Y. Hao, M.  
1007 Stoeckius, P. Smibert, R. Satija, Comprehensive Integration of Single-Cell Data. *Cell* **177**, 1888-  
1008 1902.e21 (2019).
- 1009 69. J. L. Del-Aguila, Z. Li, U. Dube, K. A. Mihindikulasuriya, J. P. Budde, M. V. Fernandez, L.  
1010 Ibanez, J. Bradley, F. Wang, K. Bergmann, R. Davenport, J. C. Morris, D. M. Holtzman, R. J.  
1011 Perrin, B. A. Benitez, J. Dougherty, C. Cruchaga, O. Harari, A single-nuclei RNA sequencing  
1012 study of Mendelian and sporadic AD in the human brain. *Alzheimers Res Ther* **11**, 71 (2019).

- 1013 70. C. Hafemeister, R. Satija, Normalization and variance stabilization of single-cell RNA-seq  
1014 data using regularized negative binomial regression. *Genome Biol* **20**, 296 (2019).
- 1015 71. Y. Zhang, T. Liu, C. A. Meyer, J. Eeckhoute, D. S. Johnson, B. E. Bernstein, C. Nussbaum,  
1016 R. M. Myers, M. Brown, W. Li, X. S. Liu, Model-based Analysis of ChIP-Seq (MACS). *Genome*  
1017 *Biol* **9**, R137 (2008).
- 1018 72. H. M. Amemiya, A. Kundaje, A. P. Boyle, The ENCODE Blacklist: Identification of  
1019 Problematic Regions of the Genome. *Sci Rep* **9**, 9354 (2019).
- 1020 73. H. A. Pliner, J. S. Packer, J. L. McFaline-Figueroa, D. A. Cusanovich, R. M. Daza, D.  
1021 Aghamirzaie, S. Srivatsan, X. Qiu, D. Jackson, A. Minkina, A. C. Adey, F. J. Steemers, J.  
1022 Shendure, C. Trapnell, Cicero Predicts cis-Regulatory DNA Interactions from Single-Cell  
1023 Chromatin Accessibility Data. *Mol. Cell* **71**, 858-871.e8 (2018).
- 1024 74. D. Szklarczyk, A. L. Gable, K. C. Nastou, D. Lyon, R. Kirsch, S. Pyysalo, N. T. Doncheva,  
1025 M. Legeay, T. Fang, P. Bork, L. J. Jensen, C. von Mering, The STRING database in 2021:  
1026 customizable protein-protein networks, and functional characterization of user-uploaded  
1027 gene/measurement sets. *Nucleic Acids Res* **49**, D605–D612 (2021).
- 1028 75. P. Shannon, A. Markiel, O. Ozier, N. S. Baliga, J. T. Wang, D. Ramage, N. Amin, B.  
1029 Schwikowski, T. Ideker, Cytoscape: a software environment for integrated models of  
1030 biomolecular interaction networks. *Genome Res* **13**, 2498–2504 (2003).
- 1031 76. J. A. Gustavsen, S. Pai, R. Isserlin, B. Demchak, A. R. Pico, RCy3: Network biology using  
1032 Cytoscape from within R. *F1000Res* **8**, 1774 (2019).
- 1033 77. J. H. Morris, L. Apeltsin, A. M. Newman, J. Baumbach, T. Wittkop, G. Su, G. D. Bader, T.  
1034 E. Ferrin, clusterMaker: a multi-algorithm clustering plugin for Cytoscape. *BMC Bioinformatics*  
1035 **12**, 436 (2011).
- 1036 78. C. E. Shannon, A Mathematical Theory of Communication. *Bell System Technical Journal*  
1037 **27**, 379–423 (1948).
- 1038 79. A. A. Margolin, I. Nemenman, K. Basso, C. Wiggins, G. Stolovitzky, R. Dalla Favera, A.  
1039 Califano, ARACNE: an algorithm for the reconstruction of gene regulatory networks in a  
1040 mammalian cellular context. *BMC Bioinformatics* **7 Suppl 1**, S7 (2006).
- 1041 80. P. Langfelder, S. Horvath, WGCNA: an R package for weighted correlation network  
1042 analysis. *BMC Bioinformatics* **9**, 559 (2008).
- 1043 81. L. He, J. Davila-Velderrain, T. S. Sumida, D. A. Hafler, M. Kellis, A. M. Kulminski,  
1044 NEBULA is a fast negative binomial mixed model for differential or co-expression analysis of  
1045 large-scale multi-subject single-cell data. *Commun Biol* **4**, 629 (2021).
- 1046 82. V. Kleshchevnikov, A. Shmatko, E. Dann, A. Aivazidis, H. W. King, T. Li, R. Elmentaite, A.  
1047 Lomakin, V. Kedlian, A. Gayoso, M. S. Jain, J. S. Park, L. Ramona, E. Tuck, A. Arutyunyan, R.

- 1048 Vento-Tormo, M. Gerstung, L. James, O. Stegle, O. A. Bayraktar, Cell2location maps fine-  
1049 grained cell types in spatial transcriptomics. *Nat Biotechnol* **40**, 661–671 (2022).
- 1050 83. D. Kim, J. M. Paggi, C. Park, C. Bennett, S. L. Salzberg, Graph-based genome alignment and  
1051 genotyping with HISAT2 and HISAT-genotype. *Nat Biotechnol* **37**, 907–915 (2019).
- 1052 84. M. I. Love, W. Huber, S. Anders, Moderated estimation of fold change and dispersion for  
1053 RNA-seq data with DESeq2. *Genome Biol* **15**, 550 (2014).
- 1054 85. Y. Benjamini, Y. Hochberg, Controlling the False Discovery Rate: A Practical and Powerful  
1055 Approach to Multiple Testing. *Journal of the Royal Statistical Society: Series B*  
1056 (*Methodological*) **57**, 289–300 (1995).



1057 **Data and materials availability:**

1058 Human iMGL bulk RNA-seq data are available under GEO accession GSE226507. The snRNA-  
1059 seq data from the Knight ADRC is publicly available by request from the National Institute on  
1060 Aging Genetics of Alzheimer's Disease Data Storage Site (NIAGADS) under accession number  
1061 NG00108 (<https://www.niagads.org/datasets/ng00108>). DIAN brain bank snRNA-seq data  
1062 access requires a request through <https://dian.wustl.edu/our-research/for-investigators>. All scripts  
1063 necessary to reproduce the figures from this manuscript will be available at  
1064 [https://github.com/albanus-research/2021\\_trem2\\_adad\\_snRNAseq](https://github.com/albanus-research/2021_trem2_adad_snRNAseq). The modified CytoTalk  
1065 version used for this manuscript is available at <https://github.com/rdalbanus/CytoTalk>.

1066 **Acknowledgments:**

1067 This manuscript has been reviewed by DIAN Study investigators for scientific content and  
1068 consistency of data interpretation with previous DIAN Study publications. We acknowledge the  
1069 altruism of the participants and their families and the contributions of the DIAN research and  
1070 support staff at each participating site for their contributions to this study. The data available in  
1071 the AD Knowledge Portal would not be possible without the participation of research volunteers  
1072 and the contribution of data by collaborating researchers. The results published here are in whole  
1073 or in part based on data obtained from the AD Knowledge Portal  
1074 (<https://adknowledgeportal.org>). This work was supported by access to equipment made possible  
1075 by the Hope Center for Neurological Disorders and the Departments of Neurology and  
1076 Psychiatry at Washington University School of Medicine. We thank Barbara Corneo for advice  
1077 on iPSC protocols and Wei Wang and Caisheng (Luke) Lu, MD, Ph.D., for assisting with FACS  
1078 sorting. iMGL cell sequencing and preliminary RNA-seq data processing were conducted by  
1079 Novogene.

1080 **Funding:**

1081 Data collection and sharing for this project was supported by The Dominantly Inherited  
1082 Alzheimer Network (DIAN, U19AG032438), funded by the National Institute on Aging (NIA),  
1083 the Alzheimer's Association (SG-20-690363-DIAN), the German Center for Neurodegenerative  
1084 Diseases (DZNE), Raul Carrea Institute for Neurological Research (FLENI), Partial support by  
1085 the Research and Development Grants for Dementia from Japan Agency for Medical Research  
1086 and Development, AMED, and the Korea Health Technology R&D Project through the Korea  
1087 Health Industry Development Institute (KHIDI), Spanish Institute of Health Carlos III (ISCIII),  
1088 Canadian Institutes of Health Research (CIHR), Canadian Consortium of Neurodegeneration and  
1089 Aging, Brain Canada Foundation, and Fonds de Recherche du Québec – Santé. This research  
1090 was supported by NIH grants R01AG067606 (TWK), R56AG067764 (OH), U01AG072464  
1091 (CMK, OH), NINDS R01NS118146 and R21NS127211 (to BAB), NIH R01AG062734 (CMK),  
1092 NIA R01AG075092 (HF), P30AG066444 (JCM), P01AGO26276 (JCM), and P01AG003991  
1093 (JCM). Additional funding from the Chan Zuckerberg Initiative (CMK, OH) and the Department  
1094 of Defense (W81XWH1910309 to HF). O.H. is an Archer Foundation Research Scientist.

1095 **Author contributions:**

1096 RDA analyzed data, designed and performed computational experiments, wrote the manuscript.  
1097 GMF analyzed data, designed and performed iPSC experiments, wrote the manuscript. LB  
1098 performed initial snRNA-seq quality control, cell clustering, and integration with public datasets.  
1099 SC annotated spatial transcriptomics data. QG performed spatial transcriptomics deconvolution.  
1100 AK designed and performed experiments, analyzed data, and revised the manuscript. MA  
1101 performed experiments and revised the manuscript. SFY performed computational experiments.  
1102 BCN performed initial snRNA-seq processing quality control. PMRP revised the manuscript.  
1103 DMH revised the manuscript. JCM supervised sample acquisition and revised manuscript. EMD  
1104 supervised sample acquisition, revised manuscript. MF supervised sample acquisition and  
1105 revised the manuscript. JPC supervised sample acquisition, revised manuscript. RJP supervised  
1106 and participated in sample acquisition, performed neuropathological assessments, and revised the  
1107 manuscript. EEM contributed to experimental data acquisition. BAB analyzed data, supervised  
1108 snRNA-seq data generation, and revised the manuscript. LP conceptualized results and revised  
1109 the manuscript. GTS supervised sample and genetic data acquisition, revised manuscript. QM  
1110 supervised spatial transcriptomics computational analyses. HF: Supervised sample acquisition  
1111 and revised manuscript. CMK supervised experimental data acquisition and revised the  
1112 manuscript. OH conceptualized and designed computational experiments, analyzed data,  
1113 supervised and edited the manuscript, and supervised all aspects of the project. TWK  
1114 conceptualized and designed iPSC experiments, analyzed data, supervised and edited the  
1115 manuscript, and supervised all aspects of the project.

1116 **Competing interests:**

1117 TWK is a cofounder of BL Melanis Co. Ltd. DMH co-founded and is on the scientific advisory  
1118 board of C2N Diagnostics. DMH consults for Genentech, Denali, Cajal Neurosciences, and  
1119 Alector. JCM. is a consultant for the Barcelona Brain Research Center (BBRC) and the TS  
1120 Srinivasan Advisory Board. JCM. is a consultant for the Barcelona Brain Research Center  
1121 (BBRC) and the TS Srinivasan Advisory Board. JCM. is an advisory board member for the Cure  
1122 Alzheimer's Fund Research Strategy Council. JCM receives research support from the NIH and  
1123 the Alzheimer's Association (US) and is a member of the advisory board for Humana  
1124 Healthcare. EMD receives research support from the NIA, Hoffman-LaRoche, and Eli Lilly, is a  
1125 member of advisory boards for Eli Lilly, Alector, and the NIA, and holds a leadership role in  
1126 Foundation Alzheimer and Alzamend. The remaining authors have no competing interests  
1127 related to this study.

1128 **Supplementary Materials:**

1129 Materials and Methods

1130 Fig. S1 to S14

1131 References (65-85)

1132 **Other Supplementary Material for this manuscript includes the following:**

1133 Table S1 to S6 (Excel files)
